# Supplementary material for: Large-scale reduction of the Bacillus subtilis genome: consequences for the transcriptional network, resource allocation, and metabolism
Source: PubMed Central journal article supplement — Genome Res. 2017 Feb;27(2):289–99. doi: 10.1101/gr.215293.116 (PMC5287234; doi:10.1101/gr.215293.116), 2017-02
Supplement: supp_gr.215293.116_Supplemental_Data_S2.pdf [file supp_gr.215293.116_Supplemental_Data_S2.pdf]

# PG10

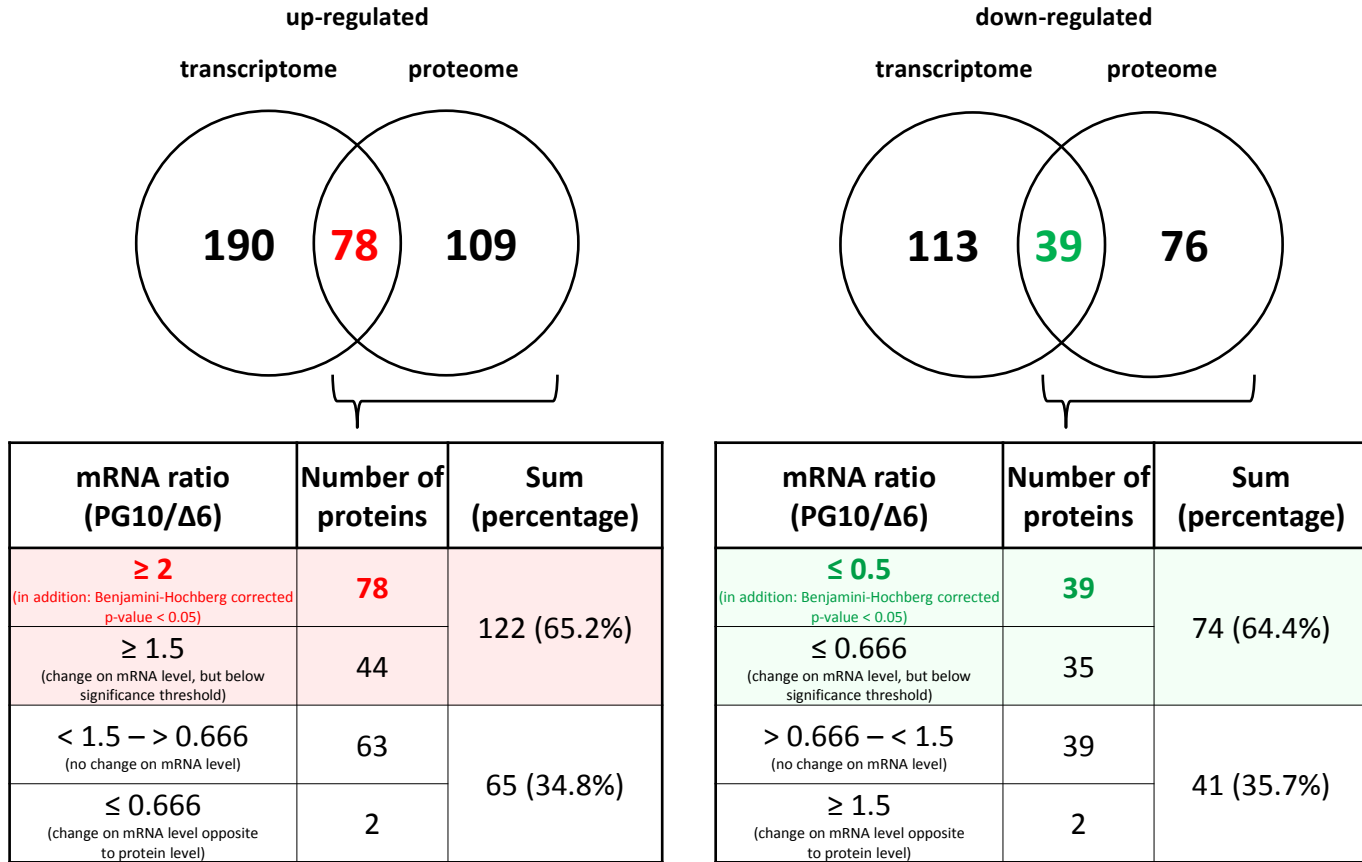

**Comparison of gene expression changes revealed by the transcriptome and proteome analyses.**

For both genome-reduced strains, the Venn diagrams (upper part) display the number of mRNAs and proteins passing the significance threshold for up-regulation and down-regulation, respectively. Overlapping areas represent genes exhibiting significantly altered expression at both the mRNA and protein levels. The tables show a classification of all proteins with different amounts between the respective genome-reduced strain and the reference strain  $\Delta 6$  based on the mRNA ratios and p-values of the corresponding genes.

# PS38

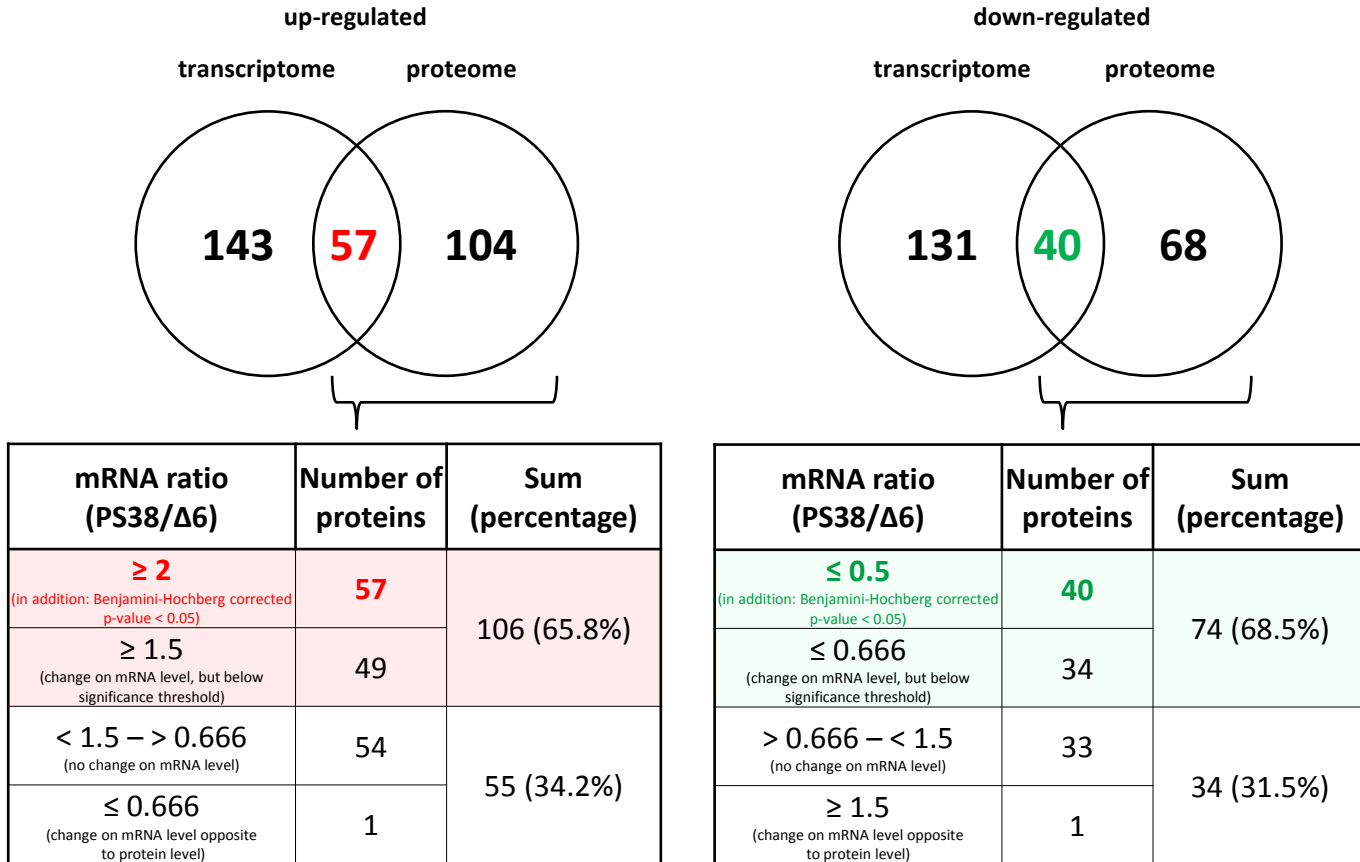

**Comparison of gene expression changes revealed by the transcriptome and proteome analyses.**

For both genome-reduced strains, the Venn diagrams (upper part) display the number of mRNAs and proteins passing the significance threshold for up-regulation and down-regulation, respectively. Overlapping areas represent genes exhibiting significantly altered expression at both the mRNA and protein levels. The tables show a classification of all proteins with different amounts between the respective genome-reduced strain and the reference strain Δ6 based on the mRNA ratios and p-values of the corresponding genes.
