# Supplementary material for: Large-scale reduction of the Bacillus subtilis genome: consequences for the transcriptional network, resource allocation, and metabolism
Source: PubMed Central journal article supplement — Genome Res. 2017 Feb;27(2):289–99. doi: 10.1101/gr.215293.116 (PMC5287234; doi:10.1101/gr.215293.116), 2017-02
Supplement: supp_gr.215293.116_Supplemental_Fig_S1.pdf [file supp_gr.215293.116_Supplemental_Fig_S1.pdf]

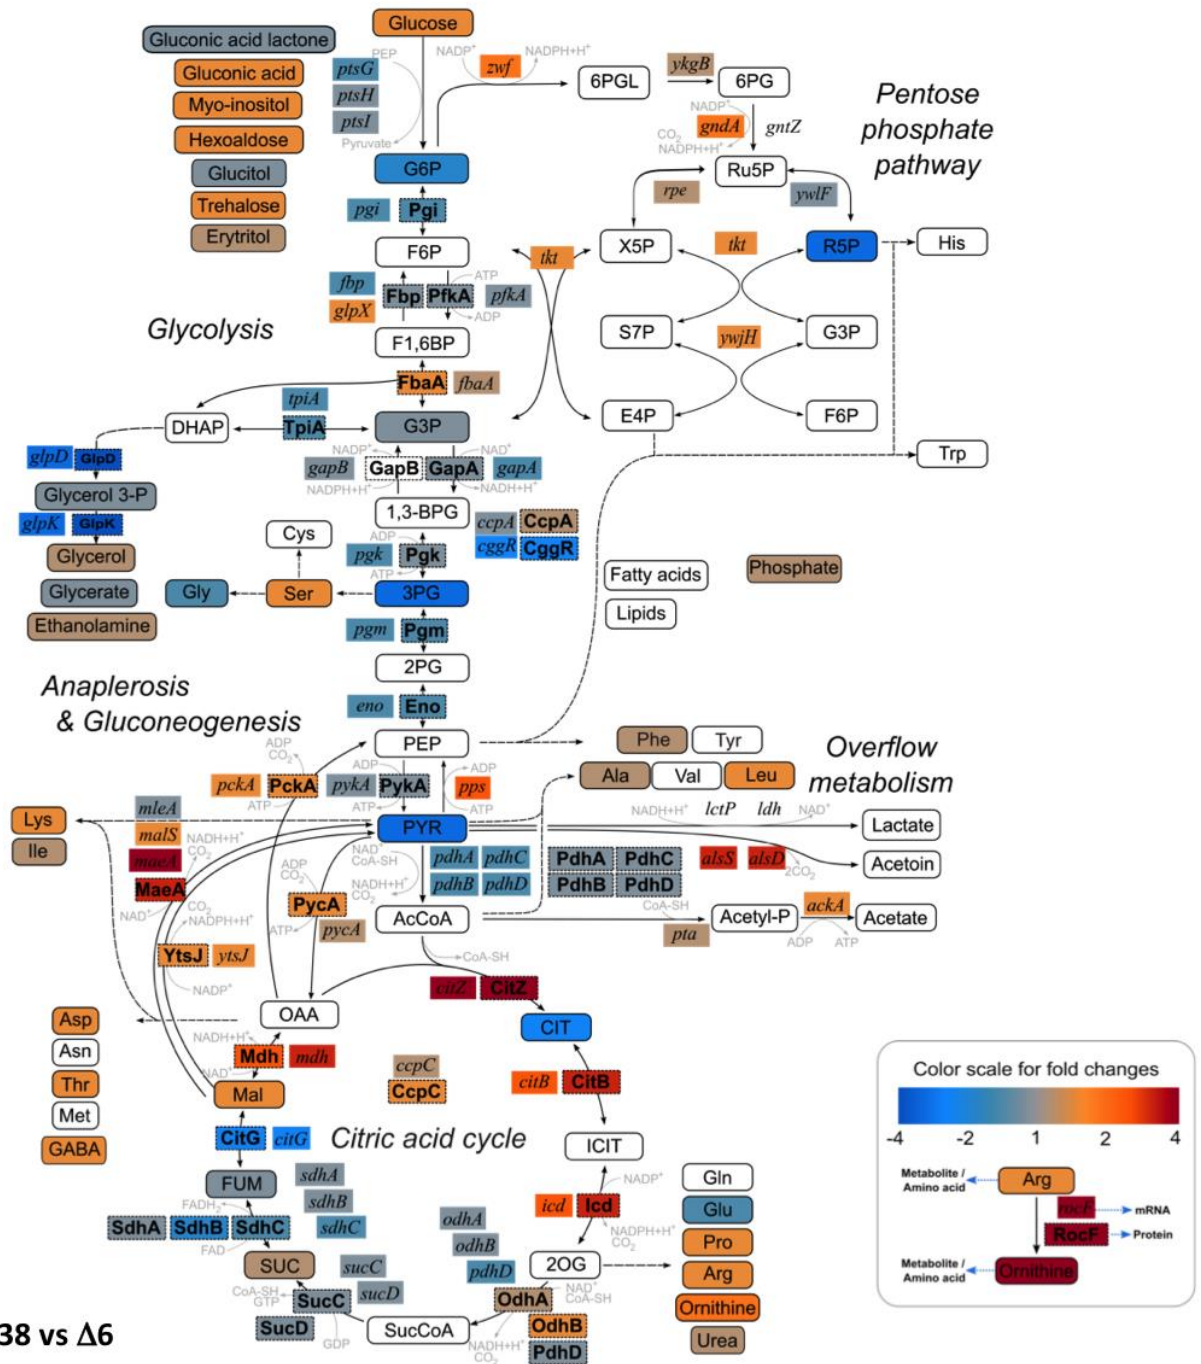

**Supplemental Fig S1.** Integrated view of relative transcript, protein, and metabolite concentrations in central carbon metabolism for the genome-reduced strain PS38.
