# Supplementary material for: Large-scale reduction of the Bacillus subtilis genome: consequences for the transcriptional network, resource allocation, and metabolism
Source: PubMed Central journal article supplement — Genome Res. 2017 Feb;27(2):289–99. doi: 10.1101/gr.215293.116 (PMC5287234; doi:10.1101/gr.215293.116), 2017-02
Supplement: supp_gr.215293.116_Supplemental_Fig_S2.pdf [file supp_gr.215293.116_Supplemental_Fig_S2.pdf]

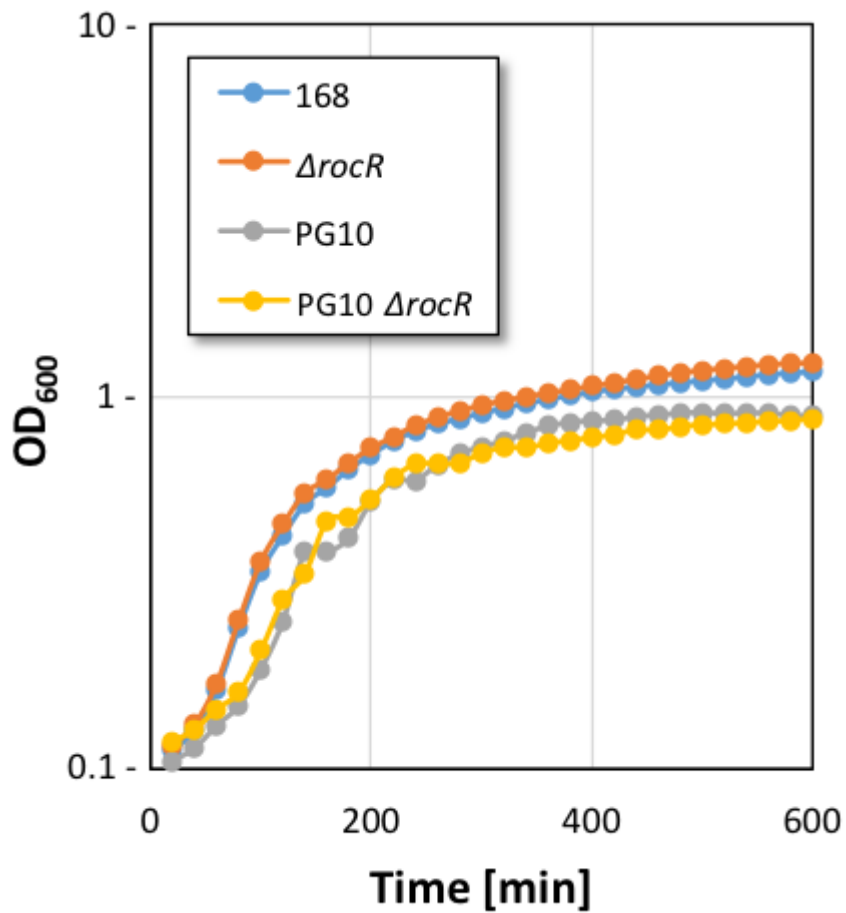

**Supplemental Fig S2.**

Impact of a *rocR* mutation on growth of *B. subtilis* in the 168 wild type and the PG10 backgrounds. Cells were cultivated in Lysogeny broth supplemented with 0.5% glucose. The optical density was measured in a SynergyMx plate reader (BioTek Instruments Inc., USA).
