# Supplementary material for: Large-scale reduction of the Bacillus subtilis genome: consequences for the transcriptional network, resource allocation, and metabolism
Source: PubMed Central journal article supplement — Genome Res. 2017 Feb;27(2):289–99. doi: 10.1101/gr.215293.116 (PMC5287234; doi:10.1101/gr.215293.116), 2017-02
Supplement: supp_gr.215293.116_Supplemental_Table_S2.pdf [file supp_gr.215293.116_Supplemental_Table_S2.pdf]

**Supplemental Table S2: Mutations found in the genome-reduced strains IIG-Bs27-47-24, PG10 and PS38**

The variations were detected with a minimal coverage of 25 and a minimum variant frequency of 0.8 compared to the *Bacillus subtilis* Δ6 sequence (CP010314)

**Color code for the single mutations**

|                                    |
|------------------------------------|
| unique in this strain              |
| present in all strains             |
| present in IIG-Bs27-47-24 and PG10 |
| present in IIG-Bs27-47-24 and PS38 |
| present in PG10 and PS38           |

**Legend**

- 1 Locus tag of the gene referring to the *Bacillus subtilis* 168 sequence (NC\_000946)
- 2 Coding sequence position
- 3 Start point of the mutation referring to the *Bacillus subtilis* Δ6 sequence (CP010314)
- 4 End point of the mutation referring to the *Bacillus subtilis* Δ6 sequence (CP010314)
- 5 Coverage at the given genome position of the mutation
- 6 Frequency of the mutation at the given genome position

**Mutations in IIG-Bs27-47-24**

| Gene | Locus tag <sup>1</sup> | CDS Position <sup>2</sup> | Nucleotide Change | Polymorphism Type         | Codon Change       | Amino Acid Change | Protein Effect | Minimum <sup>3</sup> | Maximum <sup>4</sup> | Coverage <sup>5</sup> | Variant Frequency <sup>6</sup> |
|------|------------------------|---------------------------|-------------------|---------------------------|--------------------|-------------------|----------------|----------------------|----------------------|-----------------------|--------------------------------|
| mfd  | BSU00550               | 1,612                     | G -> C            | SNP (transversion)        | GGC -> CGC         | G -> R            | Substitution   | 62,041               | 62,041               | 307                   | 99.7%                          |
|      |                        |                           | A -> G            | SNP (transition)          |                    |                   |                |                      | 171,679              | 171,679               | 222                            |
| ydfB | BSU05350               | 34                        | (A)10 -> (A)11    | Insertion (tandem repeat) |                    |                   | Frame Shift    | 543,184              | 543,183              | 412                   | 95.6%                          |
| yfiB | BSU07735               | 80                        | K -> T            | SNP                       | AKG -> ATG         | X -> M            | Substitution   | 794,309              | 794,309              | 122                   | 82.0%                          |
| yhdW | BSU09620               | 473                       | A -> C            | SNP (transversion)        | GTC -> GGC         | V -> G            | Substitution   | 987,924              | 987,924              | 214                   | 99.5%                          |
| yjcD | BSU11820               | 1,986                     | T -> C            | SNP (transition)          | GGA -> GGG         |                   | None           | 1,203,852            | 1,203,852            | 292                   | 97.9%                          |
| yjcD | BSU11820               | 1,906                     | C -> T            | SNP (transition)          | GAA -> AAA         | E -> K            | Substitution   | 1,203,932            | 1,203,932            | 226                   | 100.0%                         |
| yjcD | BSU11820               | 1,826                     | T -> C            | SNP (transition)          | GAC -> GGC         | D -> G            | Substitution   | 1,204,012            | 1,204,012            | 261                   | 99.2%                          |
| yjcR | BSU11960               | 296                       | A -> G            | SNP (transition)          | GAA -> GGA         | E -> G            | Substitution   | 1,217,840            | 1,217,840            | 277                   | 98.6%                          |
| pit  | BSU12840               | 682                       | C -> T            | SNP (transition)          | GCC -> ACC         | A -> T            | Substitution   | 1,265,548            | 1,265,548            | 255                   | 99.2%                          |
| dgcW | BSU13420               | 2,209                     | -GAATTGTTCT -> G  | Deletion                  | GAA,CAA,TTC ->     | EQF ->            | Deletion       | 1,323,122            | 1,323,130            | 260                   | 100.0%                         |
|      |                        |                           | T -> G            | SNP (transversion)        |                    |                   |                |                      | 1,457,594            | 1,457,594             | 242                            |
| ymzA | BSU17360               | 218                       | (A)9 -> (A)8      | Deletion (tandem repeat)  |                    |                   | Frame Shift    | 1,709,166            | 1,709,166            | 301                   | 100.0%                         |
| scuA | BSU21750               | 243                       | T -> G            | SNP (transversion)        | AAA -> AAC         | K -> N            | Substitution   | 1,998,446            | 1,998,446            | 350                   | 99.7%                          |
| gpsB | BSU22180               | 199                       | (T)6 -> (T)7      | Insertion (tandem repeat) |                    |                   | Frame Shift    | 2,038,282            | 2,038,281            | 172                   | 99.4%                          |
| trpC | BSU22660               | 672                       | C -> T            | SNP (transition)          | GCG -> GCA         |                   | None           | 2,080,621            | 2,080,621            | 273                   | 100.0%                         |
| trpC | BSU22660               | 669                       | C -> T            | SNP (transition)          | GGG -> GGA         |                   | None           | 2,080,624            | 2,080,624            | 257                   | 100.0%                         |
| trpC | BSU22660               | 660                       | A -> T            | SNP (transversion)        | AAT -> AAA         | N -> K            | Substitution   | 2,080,633            | 2,080,633            | 238                   | 100.0%                         |
| trpC | BSU22660               | 606                       | AG -> GT          | Substitution              | TCC,TTG -> TCA,CTG |                   | None           | 2,080,686            | 2,080,687            | 189 -> 194            | 98.5% -> 98.9%                 |
| trpC | BSU22660               | 593                       | A -> G            | SNP (transition)          | GTT -> GCT         | V -> A            | Substitution   | 2,080,700            | 2,080,700            | 188                   | 99.5%                          |
| trpC | BSU22660               | 591                       | G -> A            | SNP (transition)          | CTC -> CTT         |                   | None           | 2,080,702            | 2,080,702            | 191                   | 100.0%                         |
| trpC | BSU22660               | 566                       | T -> A            | SNP (transversion)        | AAG -> ATG         | K -> M            | Substitution   | 2,080,727            | 2,080,727            | 215                   | 99.5%                          |
| trpC | BSU22660               | 562                       | TAC -> GAT        | Substitution              | GTA -> ATC         | V -> I            | Substitution   | 2,080,729            | 2,080,731            | 200 -> 208            | 99.0%                          |
| trpC | BSU22660               | 558                       | T -> G            | SNP (transversion)        | ACA -> ACC         |                   | None           | 2,080,735            | 2,080,735            | 189                   | 99.5%                          |
| trpC | BSU22660               | 549                       | C -> A            | SNP (transversion)        | ACG -> ACT         |                   | None           | 2,080,744            | 2,080,744            | 190                   | 100.0%                         |
| trpC | BSU22660               | 534                       | A -> G            | SNP (transition)          | AAT -> AAC         |                   | None           | 2,080,759            | 2,080,759            | 212                   | 99.5%                          |
| trpC | BSU22660               | 531                       | A -> G            | SNP (transition)          | AAT -> AAC         |                   | None           | 2,080,762            | 2,080,762            | 220                   | 98.6%                          |

|        |          |                  |                          |                    |          |              |           |           |            |                |
|--------|----------|------------------|--------------------------|--------------------|----------|--------------|-----------|-----------|------------|----------------|
| trpC   | BSU22660 | 526 C -> T       | SNP (transition)         | GTA -> ATA         | V -> I   | Substitution | 2,080,767 | 2,080,767 | 228        | 100.0%         |
| trpC   | BSU22660 | 516 G -> A       | SNP (transition)         | GAC -> GAT         |          | None         | 2,080,777 | 2,080,777 | 240        | 100.0%         |
| trpC   | BSU22660 | 513 G -> A       | SNP (transition)         | CCC -> CCT         |          | None         | 2,080,780 | 2,080,780 | 233        | 100.0%         |
| trpC   | BSU22660 | 510 T -> C       | SNP (transition)         | ACA -> ACG         |          | None         | 2,080,783 | 2,080,783 | 237        | 98.7%          |
| trpC   | BSU22660 | 504 C -> T       | SNP (transition)         | GTG -> GTA         |          | None         | 2,080,789 | 2,080,789 | 233        | 99.6%          |
| trpC   | BSU22660 | 478 A -> T       | SNP (transversion)       | TCA -> ACA         | S -> T   | Substitution | 2,080,815 | 2,080,815 | 263        | 99.6%          |
| trpC   | BSU22660 | 446 C -> T       | SNP (transition)         | GGG -> GAG         | G -> E   | Substitution | 2,080,847 | 2,080,847 | 310        | 99.7%          |
| trpC   | BSU22660 | 393 C -> T       | SNP (transition)         | GAG -> GAA         |          | None         | 2,080,900 | 2,080,900 | 270        | 99.3%          |
| trpC   | BSU22660 | 345 T -> C       | SNP (transition)         | GTA -> GTG         |          | None         | 2,080,948 | 2,080,948 | 284        | 99.3%          |
| trpC   | BSU22660 | 326 +TAA         | Insertion                | TTT -> TTT,ATT     | F -> FI  | Insertion    | 2,080,968 | 2,080,967 | 254 -> 261 | 100.0%         |
| trpC   | BSU22660 | 315 A -> G       | SNP (transition)         | CTT -> CTC         |          | None         | 2,080,978 | 2,080,978 | 266        | 98.9%          |
| trpC   | BSU22660 | 306 A -> T       | SNP (transversion)       | ATT -> ATA         |          | None         | 2,080,987 | 2,080,987 | 268        | 100.0%         |
| trpC   | BSU22660 | 294 A -> G       | SNP (transition)         | CGT -> CGC         |          | None         | 2,080,999 | 2,080,999 | 206        | 99.5%          |
| trpC   | BSU22660 | 229 T -> G       | SNP (transversion)       | ATT -> CTT         | I -> L   | Substitution | 2,081,064 | 2,081,064 | 220        | 99.5%          |
| trpC   | BSU22660 | 219 C -> T       | SNP (transition)         | AAG -> AAA         |          | None         | 2,081,074 | 2,081,074 | 225        | 100.0%         |
| trpC   | BSU22660 | 210 CC -> TT     | Substitution             | GAG,GCT -> GAA,ACT | EA -> ET | Substitution | 2,081,082 | 2,081,083 | 224 -> 233 | 99.1% -> 99.6% |
| trpC   | BSU22660 | 191 T -> C       | SNP (transition)         | CAG -> CGG         | Q -> R   | Substitution | 2,081,102 | 2,081,102 | 215        | 100.0%         |
| trpC   | BSU22660 | 175 C -> T       | SNP (transition)         | GAT -> AAT         | D -> N   | Substitution | 2,081,118 | 2,081,118 | 204        | 99.5%          |
| trpC   | BSU22660 | 147 T -> C       | SNP (transition)         | GCA -> GCG         |          | None         | 2,081,146 | 2,081,146 | 204        | 100.0%         |
| trpC   | BSU22660 | 132 G -> A       | SNP (transition)         | GCC -> GCT         |          | None         | 2,081,161 | 2,081,161 | 181        | 100.0%         |
| trpC   | BSU22660 | 107 G -> A       | SNP (transition)         | CCG -> CTG         | P -> L   | Substitution | 2,081,186 | 2,081,186 | 150        | 100.0%         |
| trpC   | BSU22660 | 90 C -> T        | SNP (transition)         | AAG -> AAA         |          | None         | 2,081,203 | 2,081,203 | 169        | 100.0%         |
| trpC   | BSU22660 | 75 C -> T        | SNP (transition)         | GAG -> GAA         |          | None         | 2,081,218 | 2,081,218 | 152        | 100.0%         |
|        |          | (A)8 -> (A)7     | Deletion (tandem repeat) |                    |          |              | 2,090,875 | 2,090,875 | 298        | 100.0%         |
| spoVAF | BSU23390 | 891 -G           | Deletion                 |                    |          | Frame Shift  | 2,145,367 | 2,145,367 | 138        | 100.0%         |
| yqhO   | BSU24510 | 649 (T)8 -> (T)7 | Deletion (tandem repeat) |                    |          | Frame Shift  | 2,249,068 | 2,249,068 | 165        | 100.0%         |
| yteP   | BSU30135 | 225 (C)4 -> (C)3 | Deletion (tandem repeat) |                    |          | Frame Shift  | 2,744,313 | 2,744,313 | 239        | 100.0%         |
|        |          | A -> G           | SNP (transition)         |                    |          |              | 2,834,354 | 2,834,354 | 204        | 99.0%          |
|        |          | T -> A           | SNP (transversion)       |                    |          |              | 2,839,755 | 2,839,755 | 153        | 96.1%          |
|        |          | A -> G           | SNP (transition)         |                    |          |              | 2,849,468 | 2,849,468 | 274        | 98.5%          |
|        |          | A -> T           | SNP (transversion)       |                    |          |              | 2,849,471 | 2,849,471 | 236        | 99.6%          |
|        |          | G -> T           | SNP (transversion)       |                    |          |              | 2,849,473 | 2,849,473 | 261        | 99.2%          |
|        |          | GT -> TG         | Substitution             |                    |          |              | 2,849,475 | 2,849,476 | 257 -> 260 | 98.8% -> 99.2% |
| degQ   | BSU31720 | 87 A -> G        | SNP (transition)         | ATT -> ATC         |          | None         | 2,918,458 | 2,918,458 | 246        | 99.2%          |
| pncA   | BSU31760 | 234 T -> C       | SNP (transition)         | GGA -> GGG         |          | None         | 2,922,521 | 2,922,521 | 450        | 99.3%          |
| yusT   | BSU32920 | 350 -C           | Deletion                 |                    |          | Frame Shift  | 3,039,554 | 3,039,554 | 234        | 100.0%         |
|        |          | A -> G           | SNP (transition)         |                    |          |              | 3,256,558 | 3,256,558 | 246        | 99.2%          |
| ywIC   | BSU36950 | 657 C -> A       | SNP (transversion)       | GTG -> GTT         |          | None         | 3,454,666 | 3,454,666 | 219        | 99.5%          |
| narK   | BSU37320 | 1,077 C -> T     | SNP (transition)         | GGG -> GGA         |          | None         | 3,493,751 | 3,493,751 | 223        | 99.1%          |
|        |          | C -> T           | SNP (transition)         |                    |          |              | 3,543,354 | 3,543,354 | 192        | 96.9%          |
|        |          | T -> A           | SNP (transversion)       |                    |          |              | 3,598,864 | 3,598,864 | 370        | 100.0%         |
| htpG   | BSU39820 | 1,631 C -> T     | SNP (transition)         | GGC -> GAC         | G -> D   | Substitution | 3,750,991 | 3,750,991 | 135        | 99.3%          |
| asnH   | BSU39920 | 2,154 T -> G     | SNP (transversion)       | CTT -> CTG         |          | None         | 3,762,391 | 3,762,391 | 310        | 100.0%         |
| glxK   | BSU40040 | 1,143 C -> T     | SNP (transition)         | CTG -> CTA         |          | None         | 3,773,391 | 3,773,391 | 371        | 100.0%         |
| glxK   | BSU40040 | 597 T -> C       | SNP (transition)         | ACA -> ACG         |          | None         | 3,773,937 | 3,773,937 | 177        | 99.4%          |
| fbp    | BSU40190 | 1,908 G -> A     | SNP (transition)         | GTG -> GTA         |          | None         | 3,791,248 | 3,791,248 | 162        | 100.0%         |

Mutations in PG10

| Gene | Locus tag <sup>1</sup> | CDS Position <sup>2</sup> | Nucleotide Change | Polymorphism Type         | Codon Change       | Amino Acid Change | Protein Effect | Minimum <sup>3</sup> | Maximum <sup>4</sup> | Coverage <sup>5</sup> | Variant Frequency <sup>6</sup> |
|------|------------------------|---------------------------|-------------------|---------------------------|--------------------|-------------------|----------------|----------------------|----------------------|-----------------------|--------------------------------|
| mfd  | BSU00550               | 1,612                     | G -> C            | SNP (transversion)        | GGC -> CGC         | G -> R            | Substitution   | 62,041               | 62,041               | 254                   | 98.4%                          |
|      |                        |                           | T -> G            | SNP (transversion)        |                    |                   |                | 164,907              | 164,907              | 311                   | 87.8%                          |
|      |                        |                           | T -> G            | SNP (transversion)        |                    |                   |                | 164,908              | 164,908              | 304                   | 94.7%                          |
|      |                        |                           | T -> G            | SNP (transversion)        |                    |                   |                | 164,909              | 164,909              | 300                   | 83.7%                          |
|      |                        |                           | T -> A            | SNP (transversion)        |                    |                   |                | 164,910              | 164,910              | 294                   | 81.6%                          |
|      |                        |                           | G -> C            | SNP (transversion)        |                    |                   |                | 169,383              | 169,383              | 40                    | 87.5%                          |
|      |                        |                           | +C                | Insertion                 |                    |                   |                | 169,839              | 169,838              | 43                    | 90.7%                          |
|      |                        |                           | A -> G            | SNP (transition)          |                    |                   |                | 171,679              | 171,679              | 65                    | 92.3%                          |
| ydfB | BSU05350               | 34                        | (A)10 -> (A)11    | Insertion (tandem repeat) |                    |                   | Frame Shift    | 543,184              | 543,183              | 229                   | 95.2%                          |
|      |                        |                           | (T)17 -> (T)16    | Deletion (tandem repeat)  |                    |                   |                | 472,564              | 472,564              | 163                   | 85.9%                          |
| ydfJ | BSU05430               | 1,223                     | G -> A            | SNP (transition)          | GGA -> GAA         | G -> E            | Substitution   | 552,396              | 552,396              | 227                   | 99.6%                          |
| yfIB | BSU07735               | 80                        | K -> T            | SNP                       | AKG -> ATG         | X -> M            | Substitution   | 794,309              | 794,309              | 93                    | 93.5%                          |
| yhdW | BSU09620               | 473                       | A -> C            | SNP (transversion)        | GTC -> GGC         | V -> G            | Substitution   | 987,924              | 987,924              | 182                   | 99.5%                          |
| yjcD | BSU11820               | 1,986                     | T -> C            | SNP (transition)          | GGA -> GGG         |                   | None           | 1,203,852            | 1,203,852            | 174                   | 98.3%                          |
| yjcD | BSU11820               | 1,906                     | C -> T            | SNP (transition)          | GAA -> AAA         | E -> K            | Substitution   | 1,203,932            | 1,203,932            | 145                   | 99.3%                          |
| yjcD | BSU11820               | 1,826                     | T -> C            | SNP (transition)          | GAC -> GGC         | D -> G            | Substitution   | 1,204,012            | 1,204,012            | 168                   | 100.0%                         |
| yjcR | BSU11960               | 296                       | A -> G            | SNP (transition)          | GAA -> GGA         | E -> G            | Substitution   | 1,217,840            | 1,217,840            | 171                   | 100.0%                         |
| pit  | BSU12840               | 682                       | C -> T            | SNP (transition)          | GCC -> ACC         | A -> T            | Substitution   | 1,265,548            | 1,265,548            | 153                   | 98.7%                          |
| dgcW | BSU13420               | 2,209                     | -GAATTGTC         | Deletion                  | GAA,CAA,TTC ->     | EQF ->            | Deletion       | 1,323,122            | 1,323,130            | 191                   | 100.0%                         |
|      |                        |                           | T -> G            | SNP (transversion)        |                    |                   |                | 1,457,594            | 1,457,594            | 246                   | 100.0%                         |
| ymzA | BSU17360               | 218                       | (A)9 -> (A)8      | Deletion (tandem repeat)  |                    |                   | Frame Shift    | 1,709,166            | 1,709,166            | 179                   | 100.0%                         |
| thyA | BSU17680               | 230                       | A -> T            | SNP (transversion)        | CAG -> CTG         | Q -> L            | Substitution   | 1,743,253            | 1,743,253            | 243                   | 98.4%                          |
| ynzD | BSU17920               | 44                        | G -> A            | SNP (transition)          | GCA -> GTA         | A -> V            | Substitution   | 1,763,776            | 1,763,776            | 139                   | 97.1%                          |
| scuA | BSU21750               | 243                       | T -> G            | SNP (transversion)        | AAA -> AAC         | K -> N            | Substitution   | 1,998,446            | 1,998,446            | 215                   | 97.2%                          |
| gpsB | BSU22180               | 199                       | (T)6 -> (T)7      | Insertion (tandem repeat) |                    |                   | Frame Shift    | 2,038,282            | 2,038,281            | 137                   | 100.0%                         |
| trpC | BSU22660               | 672                       | C -> T            | SNP (transition)          | GCG -> GCA         |                   | None           | 2,080,621            | 2,080,621            | 185                   | 99.5%                          |
| trpC | BSU22660               | 669                       | C -> T            | SNP (transition)          | GGG -> GGA         |                   | None           | 2,080,624            | 2,080,624            | 190                   | 98.9%                          |
| trpC | BSU22660               | 660                       | A -> T            | SNP (transversion)        | AAT -> AAA         | N -> K            | Substitution   | 2,080,633            | 2,080,633            | 189                   | 98.4%                          |
| trpC | BSU22660               | 606                       | AG -> GT          | Substitution              | TCC,TTG -> TCA,CTG |                   | None           | 2,080,686            | 2,080,687            | 171 -> 172            | 99.4%                          |
| trpC | BSU22660               | 593                       | A -> G            | SNP (transition)          | GTT -> GCT         | V -> A            | Substitution   | 2,080,700            | 2,080,700            | 179                   | 100.0%                         |
| trpC | BSU22660               | 591                       | G -> A            | SNP (transition)          | CTC -> CTT         |                   | None           | 2,080,702            | 2,080,702            | 180                   | 98.9%                          |
| trpC | BSU22660               | 566                       | T -> A            | SNP (transversion)        | AAG -> ATG         | K -> M            | Substitution   | 2,080,727            | 2,080,727            | 180                   | 100.0%                         |
| trpC | BSU22660               | 562                       | TAC -> GAT        | Substitution              | GTA -> ATC         | V -> I            | Substitution   | 2,080,729            | 2,080,731            | 181 -> 184            | 96.7% -> 97.2%                 |
| trpC | BSU22660               | 558                       | T -> G            | SNP (transversion)        | ACA -> ACC         |                   | None           | 2,080,735            | 2,080,735            | 172                   | 100.0%                         |
| trpC | BSU22660               | 549                       | C -> A            | SNP (transversion)        | ACG -> ACT         |                   | None           | 2,080,744            | 2,080,744            | 162                   | 100.0%                         |
| trpC | BSU22660               | 534                       | A -> G            | SNP (transition)          | AAT -> AAC         |                   | None           | 2,080,759            | 2,080,759            | 171                   | 98.8%                          |
| trpC | BSU22660               | 531                       | A -> G            | SNP (transition)          | AAT -> AAC         |                   | None           | 2,080,762            | 2,080,762            | 170                   | 98.2%                          |
| trpC | BSU22660               | 526                       | C -> T            | SNP (transition)          | GTA -> ATA         | V -> I            | Substitution   | 2,080,767            | 2,080,767            | 174                   | 98.9%                          |
| trpC | BSU22660               | 516                       | G -> A            | SNP (transition)          | GAC -> GAT         |                   | None           | 2,080,777            | 2,080,777            | 183                   | 99.5%                          |
| trpC | BSU22660               | 513                       | G -> A            | SNP (transition)          | CCC -> CCT         |                   | None           | 2,080,780            | 2,080,780            | 190                   | 98.9%                          |
| trpC | BSU22660               | 510                       | T -> C            | SNP (transition)          | ACA -> ACG         |                   | None           | 2,080,783            | 2,080,783            | 188                   | 100.0%                         |
| trpC | BSU22660               | 504                       | C -> T            | SNP (transition)          | GTG -> GTA         |                   | None           | 2,080,789            | 2,080,789            | 198                   | 99.5%                          |
| trpC | BSU22660               | 478                       | A -> T            | SNP (transversion)        | TCA -> ACA         | S -> T            | Substitution   | 2,080,815            | 2,080,815            | 204                   | 99.5%                          |
| trpC | BSU22660               | 446                       | C -> T            | SNP (transition)          | GGG -> GAG         | G -> E            | Substitution   | 2,080,847            | 2,080,847            | 180                   | 100.0%                         |
| trpC | BSU22660               | 393                       | C -> T            | SNP (transition)          | GAG -> GAA         |                   | None           | 2,080,900            | 2,080,900            | 183                   | 100.0%                         |

|        |          |                  |                          |                    |          |              |           |           |                           |
|--------|----------|------------------|--------------------------|--------------------|----------|--------------|-----------|-----------|---------------------------|
| trpC   | BSU22660 | 345 T -> C       | SNP (transition)         | GTA -> GTG         |          | None         | 2,080,948 | 2,080,948 | 175 99.4%                 |
| trpC   | BSU22660 | 326 +TAA         | Insertion                | TTT -> TTT,ATT     | F -> FI  | Insertion    | 2,080,968 | 2,080,967 | 168 -> 169 98.2%          |
| trpC   | BSU22660 | 315 A -> G       | SNP (transition)         | CTT -> CTC         |          | None         | 2,080,978 | 2,080,978 | 162 100.0%                |
| trpC   | BSU22660 | 306 A -> T       | SNP (transversion)       | ATT -> ATA         |          | None         | 2,080,987 | 2,080,987 | 161 99.4%                 |
| trpC   | BSU22660 | 294 A -> G       | SNP (transition)         | CGT -> CGC         |          | None         | 2,080,999 | 2,080,999 | 134 100.0%                |
| trpC   | BSU22660 | 229 T -> G       | SNP (transversion)       | ATT -> CTT         | I -> L   | Substitution | 2,081,064 | 2,081,064 | 144 97.9%                 |
| trpC   | BSU22660 | 219 C -> T       | SNP (transition)         | AAG -> AAA         |          | None         | 2,081,074 | 2,081,074 | 142 100.0%                |
| trpC   | BSU22660 | 210 CC -> TT     | Substitution             | GAG,GCT -> GAA,ACT | EA -> ET | Substitution | 2,081,082 | 2,081,083 | 141 -> 147 95.0% -> 95.2% |
| trpC   | BSU22660 | 191 T -> C       | SNP (transition)         | CAG -> CGG         | Q -> R   | Substitution | 2,081,102 | 2,081,102 | 127 97.6%                 |
| trpC   | BSU22660 | 175 C -> T       | SNP (transition)         | GAT -> AAT         | D -> N   | Substitution | 2,081,118 | 2,081,118 | 120 98.3%                 |
| trpC   | BSU22660 | 147 T -> C       | SNP (transition)         | GCA -> GCG         |          | None         | 2,081,146 | 2,081,146 | 126 99.2%                 |
| trpC   | BSU22660 | 132 G -> A       | SNP (transition)         | GCC -> GCT         |          | None         | 2,081,161 | 2,081,161 | 129 100.0%                |
| trpC   | BSU22660 | 107 G -> A       | SNP (transition)         | CCG -> CTG         | P -> L   | Substitution | 2,081,186 | 2,081,186 | 137 99.3%                 |
| trpC   | BSU22660 | 90 C -> T        | SNP (transition)         | AAG -> AAA         |          | None         | 2,081,203 | 2,081,203 | 152 98.0%                 |
| trpC   | BSU22660 | 75 C -> T        | SNP (transition)         | GAG -> GAA         |          | None         | 2,081,218 | 2,081,218 | 142 98.6%                 |
|        |          | (A)8 -> (A)7     | Deletion (tandem repeat) |                    |          |              | 2,090,875 | 2,090,875 | 160 100.0%                |
| spoVAF | BSU23390 | 891 -G           | Deletion                 |                    |          | Frame Shift  | 2,145,367 | 2,145,367 | 103 100.0%                |
| yqhO   | BSU24510 | 649 (T)8 -> (T)7 | Deletion (tandem repeat) |                    |          | Frame Shift  | 2,249,068 | 2,249,068 | 128 100.0%                |
| tcyL   | BSU29360 | 90 C -> G        | SNP (transversion)       | CTG -> CTC         |          | None         | 2,667,801 | 2,667,801 | 205 100.0%                |
| yteP   | BSU30135 | 225 (C)4 -> (C)3 | Deletion (tandem repeat) |                    |          | Frame Shift  | 2,744,313 | 2,744,313 | 166 100.0%                |
|        |          | A -> G           | SNP (transition)         |                    |          |              | 2,834,354 | 2,834,354 | 155 99.4%                 |
|        |          | A -> G           | SNP (transition)         |                    |          |              | 2,849,468 | 2,849,468 | 174 98.9%                 |
|        |          | A -> T           | SNP (transversion)       |                    |          |              | 2,849,471 | 2,849,471 | 168 97.0%                 |
|        |          | G -> T           | SNP (transversion)       |                    |          |              | 2,849,473 | 2,849,473 | 174 97.7%                 |
|        |          | GT -> TG         | Substitution             |                    |          |              | 2,849,475 | 2,849,476 | 185 98.4%                 |
| degQ   | BSU31720 | 87 A -> G        | SNP (transition)         | ATT -> ATC         |          | None         | 2,918,458 | 2,918,458 | 159 100.0%                |
| pncA   | BSU31760 | 234 T -> C       | SNP (transition)         | GGA -> GGG         |          | None         | 2,922,521 | 2,922,521 | 255 100.0%                |
| yusT   | BSU32920 | 350 -C           | Deletion                 |                    |          | Frame Shift  | 3,039,554 | 3,039,554 | 158 100.0%                |
|        |          | A -> G           | SNP (transition)         |                    |          |              | 3,256,558 | 3,256,558 | 167 100.0%                |
| ywIC   | BSU36950 | 657 C -> A       | SNP (transversion)       | GTG -> GTT         |          | None         | 3,454,666 | 3,454,666 | 171 97.1%                 |
| narK   | BSU37320 | 1,077 C -> T     | SNP (transition)         | GGG -> GGA         |          | None         | 3,493,751 | 3,493,751 | 158 99.4%                 |
|        |          | C -> T           | SNP (transition)         |                    |          |              | 3,543,354 | 3,543,354 | 171 95.9%                 |
|        |          | T -> A           | SNP (transversion)       |                    |          |              | 3,598,864 | 3,598,864 | 250 99.6%                 |
| htpG   | BSU39820 | 1,631 C -> T     | SNP (transition)         | GGC -> GAC         | G -> D   | Substitution | 3,750,991 | 3,750,991 | 174 94.8%                 |
| asnH   | BSU39920 | 2,154 T -> G     | SNP (transversion)       | CTT -> CTG         |          | None         | 3,762,391 | 3,762,391 | 301 98.3%                 |
| glxK   | BSU40040 | 1,143 C -> T     | SNP (transition)         | CTG -> CTA         |          | None         | 3,773,391 | 3,773,391 | 263 99.6%                 |
| glxK   | BSU40040 | 597 T -> C       | SNP (transition)         | ACA -> ACG         |          | None         | 3,773,937 | 3,773,937 | 165 100.0%                |
| fbp    | BSU40190 | 1,908 G -> A     | SNP (transition)         | GTG -> GTA         |          | None         | 3,791,248 | 3,791,248 | 239 97.5%                 |

Mutations in PS38

| Gene | Locus tag <sup>1</sup> | CDS Position <sup>2</sup> | Nucleotide Change | Polymorphism Type         | Codon Change       | Amino Acid Change | Protein Effect | Minimum <sup>3</sup> | Maximum <sup>4</sup> | Coverage <sup>5</sup> | Variant Frequency <sup>6</sup> |
|------|------------------------|---------------------------|-------------------|---------------------------|--------------------|-------------------|----------------|----------------------|----------------------|-----------------------|--------------------------------|
| gyrA | BSU00070               | 648                       | T -> C            | SNP (transition)          | CCT -> CCC         |                   | None           | 7,641                | 7,641                | 242                   | 99.6%                          |
| mfd  | BSU00550               | 1,612                     | G -> C            | SNP (transversion)        | GGC -> CGC         | G -> R            | Substitution   | 62,041               | 62,041               | 328                   | 99.4%                          |
|      |                        |                           | T -> G            | SNP (transversion)        |                    |                   |                | 166,761              | 166,761              | 29                    | 89.7%                          |
|      |                        |                           | ACT -> CTC        | Substitution              |                    |                   |                | 166,844              | 166,846              | 72 -> 128             | 95.8% -> 97.7%                 |
|      |                        |                           | G -> C            | SNP (transversion)        |                    |                   |                | 169,383              | 169,383              | 64                    | 89.1%                          |
|      |                        |                           | A -> G            | SNP (transition)          |                    |                   |                | 170,064              | 170,064              | 31                    | 83.9%                          |
|      |                        |                           | A -> G            | SNP (transition)          |                    |                   |                | 170,389              | 170,389              | 46                    | 87.0%                          |
|      |                        |                           | A -> G            | SNP (transition)          |                    |                   |                | 171,679              | 171,679              | 76                    | 97.4%                          |
|      |                        |                           | (T)17 -> (T)16    | Deletion (tandem repeat)  |                    |                   |                | 472,564              | 472,564              | 217                   | 81.6%                          |
| ydfB | BSU05350               | 34                        | (A)10 -> (A)11    | Insertion (tandem repeat) |                    |                   | Frame Shift    | 543,184              | 543,183              | 332                   | 95.8%                          |
| yflB | BSU07735               | 80                        | K -> T            | SNP                       | AKG -> ATG         | X -> M            | Substitution   | 794,309              | 794,309              | 121                   | 88.4%                          |
| yhdW | BSU09620               | 473                       | A -> C            | SNP (transversion)        | GTC -> GGC         | V -> G            | Substitution   | 987,924              | 987,924              | 229                   | 99.1%                          |
| yjcD | BSU11820               | 1,986                     | T -> C            | SNP (transition)          | GGA -> GGG         |                   | None           | 1,203,852            | 1,203,852            | 290                   | 99.7%                          |
| yjcD | BSU11820               | 1,906                     | C -> T            | SNP (transition)          | GAA -> AAA         | E -> K            | Substitution   | 1,203,932            | 1,203,932            | 266                   | 98.5%                          |
| yjcD | BSU11820               | 1,826                     | T -> C            | SNP (transition)          | GAC -> GGC         | D -> G            | Substitution   | 1,204,012            | 1,204,012            | 248                   | 99.2%                          |
| yjcR | BSU11960               | 296                       | A -> G            | SNP (transition)          | GAA -> GGA         | E -> G            | Substitution   | 1,217,840            | 1,217,840            | 248                   | 99.6%                          |
| pit  | BSU12840               | 682                       | C -> T            | SNP (transition)          | GCC -> ACC         | A -> T            | Substitution   | 1,265,548            | 1,265,548            | 201                   | 100.0%                         |
| dgcW | BSU13420               | 2,209                     | -GAATTGTTCT -> G  | Deletion                  | GAA,CAA,TTC ->     | EQF ->            | Deletion       | 1,323,122            | 1,323,130            | 291                   | 99.7%                          |
|      |                        |                           | T -> G            | SNP (transversion)        |                    |                   |                | 1,457,594            | 1,457,594            | 354                   | 98.6%                          |
| ymzA | BSU17360               | 218                       | (A)9 -> (A)8      | Deletion (tandem repeat)  |                    |                   | Frame Shift    | 1,709,166            | 1,709,166            | 275                   | 100.0%                         |
| scuA | BSU21750               | 243                       | T -> G            | SNP (transversion)        | AAA -> AAC         | K -> N            | Substitution   | 1,998,446            | 1,998,446            | 302                   | 92.4%                          |
| gpsB | BSU22180               | 199                       | (T)6 -> (T)7      | Insertion (tandem repeat) |                    |                   | Frame Shift    | 2,038,282            | 2,038,281            | 232                   | 99.6%                          |
| trpC | BSU22660               | 672                       | C -> T            | SNP (transition)          | GCG -> GCA         |                   | None           | 2,080,621            | 2,080,621            | 270                   | 98.5%                          |
| trpC | BSU22660               | 669                       | C -> T            | SNP (transition)          | GGG -> GGA         |                   | None           | 2,080,624            | 2,080,624            | 280                   | 98.9%                          |
| trpC | BSU22660               | 660                       | A -> T            | SNP (transversion)        | AAT -> AAA         | N -> K            | Substitution   | 2,080,633            | 2,080,633            | 261                   | 98.1%                          |
| trpC | BSU22660               | 606                       | AG -> GT          | Substitution              | TCC,TTG -> TCA,CTG |                   | None           | 2,080,686            | 2,080,687            | 241 -> 243            | 98.8% -> 99.2%                 |
| trpC | BSU22660               | 593                       | A -> G            | SNP (transition)          | GTT -> GCT         | V -> A            | Substitution   | 2,080,700            | 2,080,700            | 254                   | 100.0%                         |
| trpC | BSU22660               | 591                       | G -> A            | SNP (transition)          | CTC -> CTT         |                   | None           | 2,080,702            | 2,080,702            | 253                   | 98.0%                          |
| trpC | BSU22660               | 566                       | T -> A            | SNP (transversion)        | AAG -> ATG         | K -> M            | Substitution   | 2,080,727            | 2,080,727            | 261                   | 97.3%                          |
| trpC | BSU22660               | 562                       | TAC -> GAT        | Substitution              | GTA -> ATC         | V -> I            | Substitution   | 2,080,729            | 2,080,731            | 255 -> 260            | 98.4% -> 98.5%                 |
| trpC | BSU22660               | 558                       | T -> G            | SNP (transversion)        | ACA -> ACC         |                   | None           | 2,080,735            | 2,080,735            | 242                   | 100.0%                         |
| trpC | BSU22660               | 549                       | C -> A            | SNP (transversion)        | ACG -> ACT         |                   | None           | 2,080,744            | 2,080,744            | 239                   | 98.7%                          |
| trpC | BSU22660               | 534                       | A -> G            | SNP (transition)          | AAT -> AAC         |                   | None           | 2,080,759            | 2,080,759            | 246                   | 100.0%                         |
| trpC | BSU22660               | 531                       | A -> G            | SNP (transition)          | AAT -> AAC         |                   | None           | 2,080,762            | 2,080,762            | 240                   | 99.6%                          |
| trpC | BSU22660               | 526                       | C -> T            | SNP (transition)          | GTA -> ATA         | V -> I            | Substitution   | 2,080,767            | 2,080,767            | 242                   | 99.2%                          |
| trpC | BSU22660               | 516                       | G -> A            | SNP (transition)          | GAC -> GAT         |                   | None           | 2,080,777            | 2,080,777            | 263                   | 99.6%                          |
| trpC | BSU22660               | 513                       | G -> A            | SNP (transition)          | CCC -> CCT         |                   | None           | 2,080,780            | 2,080,780            | 273                   | 97.1%                          |
| trpC | BSU22660               | 510                       | T -> C            | SNP (transition)          | ACA -> ACG         |                   | None           | 2,080,783            | 2,080,783            | 273                   | 99.3%                          |
| trpC | BSU22660               | 504                       | C -> T            | SNP (transition)          | GTG -> GTA         |                   | None           | 2,080,789            | 2,080,789            | 274                   | 98.5%                          |
| trpC | BSU22660               | 478                       | A -> T            | SNP (transversion)        | TCA -> ACA         | S -> T            | Substitution   | 2,080,815            | 2,080,815            | 289                   | 99.3%                          |
| trpC | BSU22660               | 446                       | C -> T            | SNP (transition)          | GGG -> GAG         | G -> E            | Substitution   | 2,080,847            | 2,080,847            | 255                   | 99.2%                          |
| trpC | BSU22660               | 393                       | C -> T            | SNP (transition)          | GAG -> GAA         |                   | None           | 2,080,900            | 2,080,900            | 277                   | 99.3%                          |
| trpC | BSU22660               | 345                       | T -> C            | SNP (transition)          | GTA -> GTG         |                   | None           | 2,080,948            | 2,080,948            | 243                   | 100.0%                         |
| trpC | BSU22660               | 326                       | +TAA              | Insertion                 | TTT -> TTT,ATT     | F -> FI           | Insertion      | 2,080,968            | 2,080,967            | 226 -> 228            | 97.3% -> 97.4%                 |
| trpC | BSU22660               | 315                       | A -> G            | SNP (transition)          | CTT -> CTC         |                   | None           | 2,080,978            | 2,080,978            | 214                   | 98.6%                          |



|        |          |                  |                          |                    |          |              |           |           |                           |
|--------|----------|------------------|--------------------------|--------------------|----------|--------------|-----------|-----------|---------------------------|
| trpC   | BSU22660 | 306 A -> T       | SNP (transversion)       | ATT -> ATA         |          | None         | 2,080,987 | 2,080,987 | 219 99.5%                 |
| trpC   | BSU22660 | 294 A -> G       | SNP (transition)         | CGT -> CGC         |          | None         | 2,080,999 | 2,080,999 | 187 98.9%                 |
| trpC   | BSU22660 | 229 T -> G       | SNP (transversion)       | ATT -> CTT         | I -> L   | Substitution | 2,081,064 | 2,081,064 | 188 99.5%                 |
| trpC   | BSU22660 | 219 C -> T       | SNP (transition)         | AAG -> AAA         |          | None         | 2,081,074 | 2,081,074 | 187 98.9%                 |
| trpC   | BSU22660 | 210 CC -> TT     | Substitution             | GAG,GCT -> GAA,ACT | EA -> ET | Substitution | 2,081,082 | 2,081,083 | 194 -> 199 97.9% -> 98.0% |
| trpC   | BSU22660 | 191 T -> C       | SNP (transition)         | CAG -> CGG         | Q -> R   | Substitution | 2,081,102 | 2,081,102 | 174 100.0%                |
| trpC   | BSU22660 | 175 C -> T       | SNP (transition)         | GAT -> AAT         | D -> N   | Substitution | 2,081,118 | 2,081,118 | 159 98.1%                 |
| trpC   | BSU22660 | 147 T -> C       | SNP (transition)         | GCA -> GCG         |          | None         | 2,081,146 | 2,081,146 | 179 100.0%                |
| trpC   | BSU22660 | 132 G -> A       | SNP (transition)         | GCC -> GCT         |          | None         | 2,081,161 | 2,081,161 | 176 100.0%                |
| trpC   | BSU22660 | 107 G -> A       | SNP (transition)         | CCG -> CTG         | P -> L   | Substitution | 2,081,186 | 2,081,186 | 189 97.9%                 |
| trpC   | BSU22660 | 90 C -> T        | SNP (transition)         | AAG -> AAA         |          | None         | 2,081,203 | 2,081,203 | 187 97.9%                 |
| trpC   | BSU22660 | 75 C -> T        | SNP (transition)         | GAG -> GAA         |          | None         | 2,081,218 | 2,081,218 | 183 100.0%                |
|        |          | (A)8 -> (A)7     | Deletion (tandem repeat) |                    |          |              | 2,090,875 | 2,090,875 | 266 100.0%                |
| spoVAF | BSU23390 | 891 -G           | Deletion                 |                    |          | Frame Shift  | 2,145,367 | 2,145,367 | 173 100.0%                |
| yqhO   | BSU24510 | 649 (T)8 -> (T)7 | Deletion (tandem repeat) |                    |          | Frame Shift  | 2,249,068 | 2,249,068 | 169 100.0%                |
| mutSB  | BSU28580 | 652 A -> T       | SNP (transversion)       | TCC -> ACC         | S -> T   | Substitution | 2,583,954 | 2,583,954 | 356 98.9%                 |
|        |          | T -> G           | SNP (transversion)       |                    |          |              | 2,721,539 | 2,721,539 | 276 99.6%                 |
|        |          | A -> G           | SNP (transition)         |                    |          |              | 2,834,354 | 2,834,354 | 232 99.6%                 |
|        |          | T -> A           | SNP (transversion)       |                    |          |              | 2,839,755 | 2,839,755 | 25 80.0%                  |
|        |          | A -> G           | SNP (transition)         |                    |          |              | 2,849,468 | 2,849,468 | 218 99.1%                 |
|        |          | A -> T           | SNP (transversion)       |                    |          |              | 2,849,471 | 2,849,471 | 206 98.1%                 |
|        |          | G -> T           | SNP (transversion)       |                    |          |              | 2,849,473 | 2,849,473 | 219 98.6%                 |
|        |          | GT -> TG         | Substitution             |                    |          |              | 2,849,475 | 2,849,476 | 228 97.8%                 |
| degQ   | BSU31720 | 87 A -> G        | SNP (transition)         | ATT -> ATC         |          | None         | 2,918,458 | 2,918,458 | 192 99.5%                 |
| pncA   | BSU31760 | 234 T -> C       | SNP (transition)         | GGA -> GGG         |          | None         | 2,922,521 | 2,922,521 | 336 99.4%                 |
| yusT   | BSU32920 | 350 -C           | Deletion                 |                    |          | Frame Shift  | 3,039,554 | 3,039,554 | 213 100.0%                |
|        |          | A -> G           | SNP (transition)         |                    |          |              | 3,256,558 | 3,256,558 | 258 99.2%                 |
| tagC   | BSU35770 | 664 G -> T       | SNP (transversion)       | GTA -> TTA         | V -> L   | Substitution | 3,345,413 | 3,345,413 | 335 99.1%                 |
| ywIC   | BSU36950 | 657 C -> A       | SNP (transversion)       | GTG -> GTT         |          | None         | 3,454,666 | 3,454,666 | 220 99.1%                 |
| narK   | BSU37320 | 1,077 C -> T     | SNP (transition)         | GGG -> GGA         |          | None         | 3,493,751 | 3,493,751 | 247 99.2%                 |
|        |          | C -> T           | SNP (transition)         |                    |          |              | 3,543,354 | 3,543,354 | 245 97.6%                 |
|        |          | T -> A           | SNP (transversion)       |                    |          |              | 3,598,864 | 3,598,864 | 337 99.4%                 |
| htpG   | BSU39820 | 1,631 C -> T     | SNP (transition)         | GGC -> GAC         | G -> D   | Substitution | 3,750,991 | 3,750,991 | 235 99.6%                 |
| asnH   | BSU39920 | 2,154 T -> G     | SNP (transversion)       | CTT -> CTG         |          | None         | 3,762,391 | 3,762,391 | 436 99.3%                 |
| glxK   | BSU40040 | 1,143 C -> T     | SNP (transition)         | CTG -> CTA         |          | None         | 3,773,391 | 3,773,391 | 386 99.7%                 |
| fbp    | BSU40190 | 1,908 G -> A     | SNP (transition)         | GTG -> GTA         |          | None         | 3,791,248 | 3,791,248 | 303 98.7%                 |
