# Supplementary material for: Large-scale reduction of the Bacillus subtilis genome: consequences for the transcriptional network, resource allocation, and metabolism
Source: PubMed Central journal article supplement — Genome Res. 2017 Feb;27(2):289–99. doi: 10.1101/gr.215293.116 (PMC5287234; doi:10.1101/gr.215293.116), 2017-02
Supplement: supp_gr.215293.116_Supplemental_Table_S3.pdf [file supp_gr.215293.116_Supplemental_Table_S3.pdf]

Supplemental Table S3: Gene expression ratios of PG10 and P538 compared to *Bacillus subtilis* Δ6

Color code

|  |                                                                                                           |
|--|-----------------------------------------------------------------------------------------------------------|
|  | Gene is differential expressed in both strains                                                            |
|  | Gene didn't pass the Benjamini Hochberg correction due to different expression in the replicate 3 of P538 |
|  | Genes are located within one operon                                                                       |

Legend

- 1 Locus tag of the gene referring to the *Bacillus subtilis* 168 sequence (NC\_000946), for newly discovered RNA features the positions on the B. subtilis 168 genome are indicated
- 2 Gene expression ratio of the genome-reduced strain compared to *Bacillus subtilis* Δ6
- 3 Benjamini Hochberg corrected P-Value

Upregulated genes

| Locus tag <sup>1</sup> | Gene                | Strand | Sigma factor | Activator        | Repressor       | Ratio PG10 <sup>2</sup> | BH P-Value <sup>3</sup> |
|------------------------|---------------------|--------|--------------|------------------|-----------------|-------------------------|-------------------------|
| BSU00120               | pdxT                |        | 1            |                  | SpoA            | 2,04                    | 0,01                    |
| BSU00490               | spoVG               |        | 1 SigH       |                  | AbrB, SinR      | 3,28                    | 0,00                    |
| BSU01580               | ybaR                |        | 1            |                  |                 | 5,44                    | 0,00                    |
| BSU01650               | ybbC                |        | -1           |                  |                 | 2,11                    | 0,03                    |
| BSU01670               | amiE                |        | -1           |                  |                 | 3,67                    | 0,02                    |
| BSU01680               | murP                |        | -1           |                  |                 | 5,80                    | 0,00                    |
| BSU01690               | murR                |        | -1           |                  |                 | 2,22                    | 0,02                    |
| BSU01700               | murQ                |        | -1           |                  |                 | 2,34                    | 0,03                    |
| BSU01710               | ybbJ                |        | -1           |                  |                 | 2,69                    | 0,01                    |
| BSU02220               | ybfI                |        | -1           |                  |                 | 2,41                    | 0,00                    |
| BSU02340               | gltP                |        | -1           |                  |                 | 4,17                    | 0,00                    |
| BSU03200               | putB                |        | 1 SigA       | PutR, SpoA       | CodY            | 140,29                  | 0,00                    |
| BSU03210               | putC                |        | 1 SigA       | PutR, SpoA       | CodY            | 136,19                  | 0,00                    |
| BSU03420               | nin                 |        | -1           | ComK             |                 | 3,93                    | 0,00                    |
| BSU03430               | nucA                |        | -1           | ComK             |                 | 2,65                    | 0,01                    |
| BSU03450               | hxlB                |        | -1           | HxlR             |                 | 2,80                    | 0,05                    |
| BSU03460               | hxlA                |        | -1           | HxlR             |                 | 2,57                    | 0,04                    |
| BSU03470               | hxlR                |        | 1            |                  |                 | 2,78                    | 0,01                    |
| BSU05380               | ydfE                |        | -1           |                  |                 | 2,07                    | 0,02                    |
| BSU05480               | mhqN                |        | 1            |                  | MhqR            | 7667,02                 | 0,00                    |
| BSU05490               | mhqO                |        | 1            |                  | MhqR            | 5920,59                 | 0,00                    |
| BSU05500               | mhqP                |        | 1            |                  | MhqR            | 755,45                  | 0,00                    |
| BSU05510               | ydfQ                |        | 1            |                  |                 | 152,52                  | 0,00                    |
| BSU05540               | ydfS                |        | 1 SigG       |                  |                 | 3,41                    | 0,00                    |
| BSU06170               | fruC                |        | 1            |                  |                 | 2,73                    | 0,00                    |
| BSU07700               | nagP                |        | 1            |                  | NagR            | 2,55                    | 0,00                    |
| BSU07840               | yfkN                |        | -1           | PhoP             | CcpA            | 7,69                    | 0,00                    |
| BSU08470               | yfhB                |        | 1            |                  |                 | 2,66                    | 0,01                    |
| BSU08490               | yfhD                |        | -1 SigB      |                  |                 | 3,24                    | 0,01                    |
| BSU08500               | yfhE                |        | -1 SigB      |                  |                 | 3,41                    | 0,00                    |
| BSU08510               | yfhF                |        | -1 SigB      |                  |                 | 4,44                    | 0,00                    |
| BSU08630               | mutY                |        | 1            |                  | YfhP            | 2,09                    | 0,00                    |
| BSU08779               | ygZC                |        | -1           |                  |                 | 3,07                    | 0,01                    |
| BSU_misc_RNA_11        | Thi-box upstream of |        | 1            |                  |                 | 2,03                    | 0,01                    |
| BSU08980               | yhbH                |        | 1 SigE       |                  |                 | 2,04                    | 0,01                    |
| BSU08990               | yhbl                |        | 1            |                  |                 | 5,46                    | 0,00                    |
| BSU09000               | yhbJ                |        | 1            |                  |                 | 5,32                    | 0,00                    |
| BSU09010               | yhcA                |        | 1            |                  |                 | 5,50                    | 0,00                    |
| BSU09020               | yhcB                |        | 1            |                  |                 | 5,18                    | 0,00                    |
| BSU09030               | yhcC                |        | 1            |                  |                 | 5,39                    | 0,00                    |
| BSU09190               | yhcR                |        | 1            |                  |                 | 2,56                    | 0,00                    |
| new_1013861_1013: S326 |                     |        | 1            |                  |                 | 2,51                    |                         |
| BSU09420               | lytE                |        | 1 SigH, SigI | WalR             | SpoA            | 3,14                    | 0,00                    |
| BSU09490               | yhdJ                |        | 1            |                  |                 | 2,74                    | 0,01                    |
| BSU09670               | dat                 |        | 1            |                  |                 | 2,30                    | 0,00                    |
| BSU09880               | yhaR                |        | 1            |                  | CcpA            | 2,45                    | 0,05                    |
| BSU10020               | serC                |        | -1           |                  |                 | 2,77                    | 0,00                    |
| BSU10070               | sndC                |        | -1           |                  |                 | 2,10                    | 0,01                    |
| BSU10180               | yhfC                |        | 1            |                  |                 | 4,30                    | 0,00                    |
| BSU10420               | comK                |        | 1            | ComK, DegU, SpoA | AbrB, CodY, Rok | 18,01                   | 0,00                    |

| Locus tag <sup>1</sup> | Gene | Strand | Sigma factor | Activator        | Repressor       | Ratio P538 <sup>2</sup> | BH P-Value <sup>3</sup> |
|------------------------|------|--------|--------------|------------------|-----------------|-------------------------|-------------------------|
| BSU01580               | ybaR |        | 1            |                  |                 | 4,34                    | 0,00                    |
| BSU01670               | amiE |        | -1           |                  |                 | 3,03                    | 0,04                    |
| BSU01680               | murP |        | -1           |                  |                 | 4,29                    | 0,00                    |
| BSU01710               | ybbJ |        | -1           |                  |                 | 2,06                    | 0,02                    |
| BSU02220               | ybfI |        | -1           |                  |                 | 2,10                    | 0,00                    |
| BSU03200               | putB |        | 1 SigA       | PutR, SpoA       | CodY            | 12,77                   | 0,00                    |
| BSU03210               | putC |        | 1 SigA       | PutR, SpoA       | CodY            | 14,45                   | 0,00                    |
| BSU03470               | hxlR |        | 1            |                  |                 | 2,19                    | 0,02                    |
| BSU04230               | amj  |        | 1 SigM       |                  |                 | 8,08                    | 0,00                    |
| BSU05380               | ydfE |        | -1           |                  |                 | 2,23                    | 0,01                    |
| BSU05470               | ydfM |        | -1           |                  |                 | 2,12                    | 0,01                    |
| BSU05480               | mhqN |        | 1            |                  | MhqR            | 7129,20                 | 0,00                    |
| BSU05490               | mhqO |        | 1            |                  | MhqR            | 5508,90                 | 0,00                    |
| BSU05500               | mhqP |        | 1            |                  | MhqR            | 748,53                  | 0,00                    |
| BSU05510               | ydfQ |        | 1            |                  |                 | 130,40                  | 0,00                    |
| BSU05540               | ydfS |        | 1 SigG       |                  |                 | 3,02                    | 0,01                    |
| BSU07700               | nagP |        | 1            |                  | NagR            | 2,27                    | 0,00                    |
| BSU07840               | yfkN |        | -1           | PhoP             | CcpA            | 4,14                    | 0,00                    |
| BSU08490               | yfhD |        | -1 SigB      |                  |                 | 3,75                    | 0,00                    |
| BSU08500               | yfhE |        | -1 SigB      |                  |                 | 3,87                    | 0,00                    |
| BSU08510               | yfhF |        | -1 SigB      |                  |                 | 4,76                    | 0,00                    |
| BSU08730               | perR |        | 1            |                  | PerR            | 2,34                    | 0,00                    |
| BSU08779               | ygZC |        | -1           |                  |                 | 2,08                    | 0,03                    |
| BSU08820               | kata |        | -1           |                  | PerR            | 16,38                   | 0,00                    |
| BSU08990               | yhbl |        | 1            |                  |                 | 6,28                    | 0,00                    |
| BSU09000               | yhbJ |        | 1            |                  |                 | 5,92                    | 0,00                    |
| BSU09010               | yhcA |        | 1            |                  |                 | 6,20                    | 0,00                    |
| BSU09020               | yhcB |        | 1            |                  |                 | 6,07                    | 0,00                    |
| BSU09030               | yhcC |        | 1            |                  |                 | 6,43                    | 0,00                    |
| new_1013861_1013: S326 |      |        | 1            |                  |                 | 2,12                    |                         |
| BSU09420               | lytE |        | 1 SigH, SigI | WalR             | SpoA            | 3,12                    | 0,00                    |
| BSU10420               | comK |        | 1            | ComK, DegU, SpoA | AbrB, CodY, Rok | 14,60                   | 0,01                    |

BSU10570 yhjN -1 2,67 0,00

| Locus tag <sup>1</sup> | Gene                | Strand | Sigma factor | Activator | Repressor            | Ratio PG10 <sup>2</sup> | BH P-Value <sup>3</sup> |
|------------------------|---------------------|--------|--------------|-----------|----------------------|-------------------------|-------------------------|
| BSU11430               | oppA                | 1      |              | TnrA      | CodY, ScoC           | 2,84                    | 0,03                    |
| BSU11440               | oppB                | 1      |              | TnrA      | CodY, ScoC           | 3,52                    | 0,02                    |
| BSU11450               | oppC                | 1      |              | TnrA      | CodY, ScoC           | 3,55                    | 0,02                    |
| BSU11460               | oppD                | 1      |              | TnrA      | CodY, ScoC           | 3,02                    | 0,01                    |
| BSU11470               | oppF                | 1      |              |           |                      | 3,10                    | 0,01                    |
| BSU11530               | coiA                | 1      |              |           |                      | 8,25                    | 0,00                    |
| BSU11839               | yjzE                | 1      | SigB         |           |                      | 8,44                    | 0,00                    |
| BSU_misc_RNA_15        | S-box upstream of m | 1      |              |           |                      | 6,48                    | 0,01                    |
| BSU11870               | metI                | 1      |              |           | S-box (termination)  | 2,60                    | 0,02                    |
| BSU11880               | metC                | 1      |              |           |                      | 2,71                    | 0,02                    |
| BSU11890               | yjck                | -1     |              |           |                      | 3,83                    | 0,00                    |
| BSU12000               | manR                | 1      |              | ManR      | CcpA                 | 42,09                   | 0,00                    |
| BSU12080               | ctaO                | -1     |              |           | AbrB                 | 12,20                   | 0,00                    |
| BSU12870               | mhqA                | 1      |              |           | MhqR                 | 48,54                   | 0,00                    |
| BSU12920               | dppA                | 1      |              |           | CodY                 | 3,15                    | 0,02                    |
| BSU12930               | dppB                | 1      |              |           | CodY                 | 4,25                    | 0,00                    |
| BSU13070               | ykkA                | 1      |              |           |                      | 3,21                    | 0,02                    |
| BSU13080               | ykkB                | 1      |              |           |                      | 5,05                    | 0,00                    |
| BSU13180               | metE                | -1     |              |           | S-box (termination)  | 2,38                    | 0,03                    |
| BSU_misc_RNA_18        | S-box upstream of m | -1     |              |           |                      | 3,72                    | 0,00                    |
| BSU13190               | ispA                | -1     |              |           | CodY                 | 2,32                    | 0,01                    |
| BSU13470               | sspD                | -1     | SigG         |           |                      | 2,42                    | 0,02                    |
| BSU13520               | ykrP                | -1     |              |           |                      | 5,27                    | 0,00                    |
| BSU13530               | kinE                | 1      |              |           |                      | 5,27                    | 0,01                    |
| BSU13550               | mtnA                | -1     |              |           | S-box (termination)  | 5,47                    | 0,00                    |
| BSU13560               | mtnK                | -1     |              |           | S-box (termination)  | 5,68                    | 0,00                    |
| BSU_misc_RNA_20        | S-box upstream of m | -1     |              |           |                      | 4,31                    | 0,01                    |
| BSU13570               | mtnU                | -1     |              |           |                      | 3,38                    | 0,00                    |
| BSU13580               | mtnE                | 1      |              |           |                      | 3,92                    | 0,01                    |
| BSU_misc_RNA_21        | S-box upstream of m | 1      |              |           |                      | 3,59                    | 0,01                    |
| BSU13590               | mtnW                | 1      |              |           | S-box (termination)  | 3,14                    | 0,00                    |
| BSU13600               | mtnX                | 1      |              |           | S-box (termination)  | 3,07                    | 0,00                    |
| BSU13610               | mtnB                | 1      |              |           | S-box (termination)  | 3,14                    | 0,01                    |
| BSU13620               | mtnD                | 1      |              |           | S-box (termination)  | 3,26                    | 0,01                    |
| BSU13840               | stoA                | 1      | SigE, SigG   |           |                      | 12,86                   | 0,00                    |
| BSU14460               | ykpC                | -1     | SigI         | WalR      |                      | 3,16                    | 0,01                    |
| BSU14470               | mreBH               | -1     | SigI         | WalR      |                      | 3,27                    | 0,00                    |
| BSU14620               | slp                 | -1     |              |           |                      | 2,85                    | 0,02                    |
| BSU14800               | ylaJ                | -1     | SigG         |           |                      | 2,40                    | 0,04                    |
| BSU15340               | ylmA                | 1      |              |           | CodY                 | 2,70                    | 0,02                    |
| BSU16110               | dprA                | 1      |              | ComK      |                      | 3,57                    | 0,00                    |
| BSU17320               | ymaF                | 1      |              |           |                      | 54,75                   | 0,00                    |
| BSU17340               | hfq                 | 1      |              |           |                      | 2,29                    | 0,00                    |
| BSU17920               | ynzD                | -1     |              |           | AbrB                 | 2,59                    | 0,00                    |
| BSU18000               | citB                | 1      |              |           | CcpA, CcpC, CodY, Fs | 4,64                    | 0,00                    |
| BSU18010               | yneN                | 1      |              |           | CcpA, CcpC, CodY, Fs | 3,77                    | 0,00                    |
| new_1937876_1938/S673  |                     | -1     |              |           |                      | 3,88                    |                         |
| BSU18110               | ynfC                | -1     |              |           |                      | 3,88                    | 0,00                    |
| BSU18130               | bglC                | 1      |              |           |                      | 2,51                    | 0,00                    |
| BSU18350               | dacC                | -1     | SigH, SigB   |           |                      | 5,45                    | 0,00                    |
| BSU18360               | galM                | -1     | SigH, SigB   |           |                      | 4,22                    | 0,00                    |
| BSU18470               | proJ                | -1     |              |           |                      | 2,09                    | 0,01                    |
| BSU18480               | proH                | -1     |              |           |                      | 2,24                    | 0,01                    |
| BSU18830               | pps                 | -1     |              |           |                      | 2,70                    | 0,00                    |
| BSU19090               | yobU                | -1     |              |           |                      | 3,29                    | 0,05                    |

BSU10860 yisT -1 2,42 0,01

| Locus tag <sup>1</sup> | Gene  | Strand | Sigma factor           | Activator       | Repressor            | Ratio P538 <sup>2</sup> | BH P-Value <sup>3</sup> |
|------------------------|-------|--------|------------------------|-----------------|----------------------|-------------------------|-------------------------|
| BSU11500               | spx   | 1      | SigB, SigM, SigW, SigX |                 | PerR                 | 3,00                    | 0,00                    |
| new_1233399_1233/S415  |       | 1      |                        |                 |                      | 2,01                    |                         |
| BSU11839               | yjzE  | 1      | SigB                   |                 |                      | 9,14                    | 0,00                    |
| BSU12000               | manR  | 1      |                        | ManR            | CcpA                 | 47,48                   | 0,00                    |
| BSU12080               | ctaO  | -1     |                        |                 | AbrB                 | 13,09                   | 0,00                    |
| BSU12870               | mhqA  | 1      |                        |                 | MhqR                 | 52,61                   | 0,00                    |
| BSU13190               | ispA  | -1     |                        |                 | CodY                 | 2,02                    | 0,01                    |
| BSU13440               | ykoY  | 1      |                        | yybP-ykoY motif |                      | 2,53                    | 0,01                    |
| BSU13470               | sspD  | -1     | SigG                   |                 |                      | 3,19                    | 0,01                    |
| BSU13520               | ykrP  | -1     |                        |                 |                      | 8,04                    | 0,00                    |
| BSU13530               | kinE  | 1      |                        |                 |                      | 2,94                    | 0,03                    |
| BSU13550               | mtnA  | -1     |                        |                 | S-box (termination)  | 2,07                    | 0,04                    |
| BSU13560               | mtnK  | -1     |                        |                 | S-box (termination)  | 2,15                    | 0,03                    |
| BSU13840               | stoA  | 1      | SigE, SigG             |                 |                      | 14,19                   | 0,00                    |
| new_1454795_1455/S503  |       | -1     |                        |                 |                      | 2,95                    |                         |
| BSU13970               | ykwD  | -1     |                        |                 |                      | 5,50                    | 0,00                    |
| BSU13990               | kinA  | 1      | SigH                   | SpoA            | stringent response   | 2,13                    | 0,01                    |
| BSU14460               | ykpC  | -1     | SigI                   | WalR            |                      | 2,74                    | 0,01                    |
| BSU14470               | mreBH | -1     | SigI                   | WalR            |                      | 2,74                    | 0,00                    |
| BSU14620               | slp   | -1     |                        |                 |                      | 3,61                    | 0,01                    |
| BSU17310               | ymaG  | -1     | SpoIVCB                | GerE            |                      | 2,14                    | 0,02                    |
| BSU17320               | ymaF  | 1      |                        |                 |                      | 68,62                   | 0,00                    |
| BSU17340               | hfq   | 1      |                        |                 |                      | 2,05                    | 0,00                    |
| BSU17920               | ynzD  | -1     |                        |                 | AbrB                 | 2,98                    | 0,01                    |
| BSU18000               | citB  | 1      |                        |                 | CcpA, CcpC, CodY, Fs | 2,53                    | 0,00                    |
| BSU18010               | yneN  | 1      |                        |                 | CcpA, CcpC, CodY, Fs | 2,11                    | 0,01                    |
| new_1937876_1938/S673  |       | -1     |                        |                 |                      | 4,86                    |                         |
| BSU18110               | ynfC  | -1     |                        |                 |                      | 4,77                    | 0,00                    |
| BSU18350               | dacC  | -1     | SigH, SigB             |                 |                      | 3,10                    | 0,01                    |
| BSU18360               | galM  | -1     | SigH, SigB             |                 |                      | 2,39                    | 0,02                    |
| BSU18470               | proJ  | -1     |                        |                 |                      | 5,01                    | 0,00                    |
| BSU18480               | proH  | -1     |                        |                 |                      | 5,17                    | 0,00                    |
| BSU18830               | pps   | -1     |                        |                 |                      | 2,61                    | 0,00                    |
| BSU19130               | yocA  | 1      |                        |                 |                      | 2,09                    | 0,00                    |
| BSU19180               | des   | 1      |                        | DesR            |                      | 8,87                    | 0,02                    |
| BSU19190               | desK  | 1      |                        |                 |                      | 2,59                    | 0,04                    |
| BSU19200               | desR  | 1      |                        |                 |                      | 2,33                    | 0,05                    |

|                        |                     |        |              |                                         |                      |                         |                         |
|------------------------|---------------------|--------|--------------|-----------------------------------------|----------------------|-------------------------|-------------------------|
| BSU19400               | yojM                | -1     | SigD, SigH   | Abh, AbrB, CcpA                         | 4,82                 | 0,00                    |                         |
| BSU19410               | cwlS                | -1     | SigD, SigH   | Abh, AbrB, CcpA                         | 8,33                 | 0,00                    |                         |
| BSU19420               | yojK                | -1     |              |                                         | 51,80                | 0,00                    |                         |
| BSU21750               | ypmQ                | -1     |              |                                         | 2,65                 | 0,01                    |                         |
| Locus tag <sup>1</sup> | Gene                | Strand | Sigma factor | Activator                               | Repressor            | Ratio PG10 <sup>2</sup> | BH P-Value <sup>3</sup> |
| BSU21760               | ypmP                | -1     |              |                                         | CodY                 | 2,23                    | 0,01                    |
| BSU21770               | ilvA                | -1     |              |                                         | CodY                 | 3,05                    | 0,01                    |
| BSU21890               | ypgQ                | -1     |              |                                         |                      | 2,02                    | 0,01                    |
| BSU22570               | ypjF                | -1     |              |                                         | CcpA                 | 2,45                    | 0,01                    |
| BSU22660               | trpC                | -1     |              |                                         | TRAP (termination)   | 3,49                    | 0,01                    |
| BSU23070               | serA                | 1      |              |                                         |                      | 3,98                    | 0,00                    |
| BSU23250               | ribH                | -1     |              |                                         | FMN-box (terminatic) | 2,11                    | 0,01                    |
| BSU23260               | ribA                | -1     |              |                                         | FMN-box (terminatic) | 2,24                    | 0,01                    |
| BSU23270               | ribE                | -1     |              |                                         | FMN-box (terminatic) | 2,41                    | 0,01                    |
| BSU23280               | ribD                | -1     |              |                                         | FMN-box (terminatic) | 2,42                    | 0,01                    |
| BSU23740               | yqjU                | 1      |              |                                         |                      | 2,16                    | 0,03                    |
| BSU23810               | yqjN                | -1     |              |                                         |                      | 2,51                    | 0,01                    |
| BSU24010               | bmr                 | 1      | SigB         | BmrR, Mta                               |                      | 4,13                    | 0,00                    |
| BSU24550               | gcvPB               | -1     |              |                                         | Gly-box (terminator) | 28,06                   | 0,00                    |
| BSU24560               | gcvPA               | -1     |              |                                         | Gly-box (terminator) | 27,95                   | 0,00                    |
| BSU24570               | gcvT                | -1     |              |                                         | Gly-box (terminator) | 16,86                   | 0,00                    |
| BSU_misc RNA 38        | Gly-box upstream of | -1     |              |                                         |                      | 3,52                    | 0,00                    |
| BSU24660               | yqzE                | -1     |              | ComK                                    |                      | 60,81                   | 0,00                    |
| BSU24670               | comGG               | -1     |              | ComK                                    |                      | 74,36                   | 0,00                    |
| BSU24680               | comGF               | -1     |              | ComK                                    |                      | 170,65                  | 0,00                    |
| BSU24690               | comGE               | -1     |              | ComK                                    |                      | 154,96                  | 0,00                    |
| BSU24700               | comGD               | -1     |              | ComK                                    |                      | 246,74                  | 0,00                    |
| BSU24710               | comGC               | -1     |              | ComK                                    |                      | 214,37                  | 0,00                    |
| BSU24720               | comGB               | -1     |              | ComK                                    |                      | 271,39                  | 0,00                    |
| BSU24730               | comGA               | -1     |              | ComK                                    |                      | 171,54                  | 0,00                    |
| BSU24910               | yqgM                | -1     |              |                                         |                      | 3,22                    | 0,01                    |
| BSU24920               | yqgL                | -1     |              |                                         |                      | 3,35                    | 0,00                    |
| BSU24950               | pstBB               | -1     |              | PhoP                                    |                      | 55,83                   | 0,00                    |
| BSU24960               | pstBA               | -1     |              | PhoP                                    |                      | 57,04                   | 0,00                    |
| BSU24970               | pstA                | -1     |              | PhoP                                    |                      | 99,66                   | 0,00                    |
| BSU24980               | pstC                | -1     |              | PhoP                                    |                      | 102,50                  | 0,00                    |
| BSU24990               | pstS                | -1     |              | PhoP                                    |                      | 134,68                  | 0,00                    |
| BSU25110               | yqfU                | -1     | SigG         |                                         |                      | 2,20                    | 0,00                    |
| BSU25220               | antE                | 1      |              |                                         | AbrB                 | 2,53                    | 0,02                    |
| BSU25570               | comEC               | -1     |              | ComK, ComN (post-translational control) |                      | 25,39                   | 0,00                    |
| BSU25580               | comEB               | -1     |              | ComK, ComN (post-translational control) |                      | 2,40                    | 0,00                    |
| BSU25590               | comEA               | -1     |              | ComK, ComN (post-translational control) |                      | 52,56                   | 0,00                    |
| BSU25690               | sda                 | 1      |              | DnaA                                    | LexA                 | 3,28                    | 0,00                    |
| BSU26440               | yrkO                | 1      |              |                                         | YrkP                 | 2,63                    | 0,00                    |
| BSU26850               | yrpG                | 1      |              |                                         |                      | 4,12                    | 0,00                    |
| BSU27100               | yrhP                | -1     |              |                                         |                      | 2,73                    | 0,00                    |
| BSU27120               | sigV                | 1      | SigV         |                                         |                      | 2,14                    | 0,01                    |
| new_2779165_2779       | S1027               | -1     |              |                                         |                      | 3,13                    |                         |
| BSU27200               | yrhG                | -1     |              |                                         |                      | 3,07                    | 0,00                    |
| new_2780331_2780       | S1029               | -1     |              |                                         |                      | 2,59                    |                         |
| BSU27210               | yrhF                | -1     |              |                                         |                      | 2,37                    | 0,00                    |
| BSU27220               | yrhE                | 1      |              |                                         |                      | 12,68                   | 0,00                    |
| BSU27230               | yrhD                | 1      |              |                                         |                      | 11,29                   | 0,00                    |
| new_2840767_2840       | pipA                | -1     |              |                                         |                      | 23,58                   | 0,00                    |
| BSU27800               | yrzH                | 1      |              |                                         |                      | 2,33                    | 0,01                    |
| BSU27809               | yrzT                | 1      |              |                                         |                      | 2,35                    | 0,01                    |

|                        |                     |        |              |                                         |                      |                         |                         |
|------------------------|---------------------|--------|--------------|-----------------------------------------|----------------------|-------------------------|-------------------------|
| BSU19400               | yojM                | -1     | SigD, SigH   | Abh, AbrB, CcpA                         | 2,76                 | 0,01                    |                         |
| BSU19410               | cwlS                | -1     | SigD, SigH   | Abh, AbrB, CcpA                         | 4,85                 | 0,00                    |                         |
| BSU19420               | yojK                | -1     |              |                                         | 45,13                | 0,00                    |                         |
| BSU21750               | ypmQ                | -1     |              |                                         | 2,19                 | 0,02                    |                         |
| Locus tag <sup>1</sup> | Gene                | Strand | Sigma factor | Activator                               | Repressor            | Ratio PS38 <sup>2</sup> | BH P-Value <sup>3</sup> |
| BSU21760               | ypmP                | -1     |              |                                         | CodY                 | 2,57                    | 0,00                    |
| BSU22300               | yppC                | -1     |              |                                         |                      | 2,84                    | 0,00                    |
| BSU23070               | serA                | 1      |              |                                         |                      | 2,51                    | 0,00                    |
| BSU23090               | rsiX                | -1     | SigX         | YvrHb                                   |                      | 2,03                    | 0,01                    |
| BSU23270               | ribE                | -1     |              |                                         | FMN-box (terminatic) | 2,03                    | 0,02                    |
| BSU23280               | ribD                | -1     |              |                                         | FMN-box (terminatic) | 2,05                    | 0,02                    |
| BSU23320               | ypzC                | 1      |              |                                         |                      | 5,14                    | 0,00                    |
| BSU23328               | ypzJ                | -1     |              |                                         |                      | 2,07                    | 0,01                    |
| BSU23810               | yqjN                | -1     |              |                                         |                      | 2,35                    | 0,00                    |
| BSU23820               | yqjM                | 1      |              |                                         |                      | 2,50                    | 0,00                    |
| BSU24010               | bmr                 | 1      | SigB         | BmrR, Mta                               |                      | 3,31                    | 0,00                    |
| BSU24210               | yqjG                | 1      |              |                                         |                      | 2,37                    | 0,00                    |
| BSU24550               | gcvPB               | -1     |              |                                         | Gly-box (terminator) | 4,12                    | 0,00                    |
| BSU24560               | gcvPA               | -1     |              |                                         | Gly-box (terminator) | 4,17                    | 0,00                    |
| BSU24570               | gcvT                | -1     |              |                                         | Gly-box (terminator) | 2,83                    | 0,01                    |
| BSU_misc RNA 38        | Gly-box upstream of | -1     |              |                                         |                      | 2,22                    | 0,01                    |
| BSU24660               | yqzE                | -1     |              | ComK                                    |                      | 19,57                   | 0,00                    |
| BSU24670               | comGG               | -1     |              | ComK                                    |                      | 23,15                   | 0,00                    |
| BSU24680               | comGF               | -1     |              | ComK                                    |                      | 51,97                   | 0,00                    |
| BSU24690               | comGE               | -1     |              | ComK                                    |                      | 48,12                   | 0,00                    |
| BSU24700               | comGD               | -1     |              | ComK                                    |                      | 73,45                   | 0,00                    |
| BSU24710               | comGC               | -1     |              | ComK                                    |                      | 63,63                   | 0,00                    |
| BSU24720               | comGB               | -1     |              | ComK                                    |                      | 79,96                   | 0,00                    |
| BSU24730               | comGA               | -1     |              | ComK                                    |                      | 51,93                   | 0,00                    |
| BSU24910               | yqgM                | -1     |              |                                         |                      | 2,44                    | 0,04                    |
| BSU24920               | yqgL                | -1     |              |                                         |                      | 2,94                    | 0,01                    |
| BSU24950               | pstBB               | -1     |              | PhoP                                    |                      | 52,09                   | 0,00                    |
| BSU24960               | pstBA               | -1     |              | PhoP                                    |                      | 52,10                   | 0,00                    |
| BSU24970               | pstA                | -1     |              | PhoP                                    |                      | 91,62                   | 0,00                    |
| BSU24980               | pstC                | -1     |              | PhoP                                    |                      | 94,92                   | 0,00                    |
| BSU24990               | pstS                | -1     |              | PhoP                                    |                      | 118,49                  | 0,00                    |
| BSU25060               | yqfZ                | 1      | SigE         |                                         |                      | 3,76                    | 0,04                    |
| BSU25110               | yqfU                | -1     | SigG         |                                         |                      | 2,65                    | 0,00                    |
| BSU25220               | antE                | 1      |              |                                         | AbrB                 | 3,51                    | 0,01                    |
| BSU25570               | comEC               | -1     |              | ComK, ComN (post-translational control) |                      | 8,24                    | 0,00                    |
| BSU25590               | comEA               | -1     |              | ComK, ComN (post-translational control) |                      | 12,67                   | 0,01                    |
| BSU25690               | sda                 | 1      |              | DnaA                                    | LexA                 | 2,81                    | 0,01                    |
| BSU26410               | yrkR                | -1     |              |                                         | YrkP                 | 4,37                    | 0,00                    |
| BSU26420               | yrkQ                | -1     |              |                                         | YrkP                 | 3,29                    | 0,00                    |
| BSU26430               | yrkP                | -1     |              |                                         | YrkP                 | 3,52                    | 0,00                    |
| BSU26440               | yrkO                | 1      |              |                                         | YrkP                 | 17,59                   | 0,00                    |
| BSU26450               | yrkN                | 1      |              |                                         | YrkP                 | 7,99                    | 0,00                    |
| BSU26850               | yrpG                | 1      |              |                                         |                      | 2,91                    | 0,01                    |
| BSU27280               | yrrT                | -1     |              | Spx                                     | CymR                 | 5,94                    | 0,05                    |
| BSU_misc RNA_41        | bsrA                | -1     |              |                                         |                      | 2,00                    | 0,01                    |
| new_2840767_2840       | pipA                | -1     |              | PhoP                                    |                      | 33,90                   | 0,00                    |
| BSU27800               | yrzH                | 1      |              |                                         |                      | 3,15                    | 0,01                    |
| BSU27809               | yrzT                | 1      |              |                                         |                      | 3,18                    | 0,01                    |

|          |        |    |      |       |      |
|----------|--------|----|------|-------|------|
| BSU28040 | radC   | -1 | ComK | 2,73  | 0,01 |
| BSU28050 | maf    | -1 | ComK | 3,92  | 0,00 |
| BSU28060 | spolIB | -1 |      | 4,54  | 0,00 |
| BSU28070 | comC   | -1 | ComK | 13,04 | 0,00 |

BSU\_misc RNA 45 T-box upstream of ih -1 3,09 0,04

| Locus tag <sup>1</sup>  | Gene | Strand | Sigma factor | Activator          | Repressor                        | Ratio PG10 <sup>2</sup> | BH P-Value <sup>3</sup> |
|-------------------------|------|--------|--------------|--------------------|----------------------------------|-------------------------|-------------------------|
| BSU28490                | uvrC | -1     |              |                    | LexA                             | 2,06                    | 0,01                    |
| new_2913380_2913: S1078 |      | -1     |              |                    |                                  | 2,52                    |                         |
| BSU28510                | abf2 | -1     |              |                    | AraR, CcpA                       | 22,97                   | 0,00                    |
| BSU28560                | lcfA | -1     |              |                    | CcpA, FadR                       | 2,04                    | 0,01                    |
| BSU28650                | ysgA | -1     |              |                    |                                  | 2,43                    | 0,00                    |
| BSU28920                | lytT | -1     |              |                    |                                  | 2,06                    | 0,01                    |
| BSU28930                | lytS | -1     |              |                    |                                  | 2,11                    | 0,00                    |
| BSU28940                | ysaA | 1      |              |                    |                                  | 3,25                    | 0,00                    |
| BSU29100                | phoR | -1     | SigB, SigE   | PhoP               | CcpA                             | 2,06                    | 0,00                    |
| BSU29110                | phoP | -1     | SigB, SigE   | PhoP               | CcpA                             | 2,53                    | 0,00                    |
| BSU29120                | mdh  | -1     |              |                    | CitB (control of mRN CcpA, CcpC) | 4,54                    | 0,00                    |
| BSU29130                | icd  | -1     |              |                    | CitB (control of mRN CcpA, CcpC) | 4,26                    | 0,00                    |
| BSU29140                | citZ | -1     |              |                    | CitB (control of mRN CcpA, CcpC) | 9,55                    | 0,00                    |
| BSU29239                | ytrH | 1      | SigE         |                    |                                  | 2,26                    | 0,04                    |
| BSU29240                | ytrI | 1      | SigE         |                    |                                  | 3,16                    | 0,00                    |
| BSU29249                | ytzJ | 1      | SigE         |                    |                                  | 6,21                    | 0,00                    |
| BSU29260                | ytpl | 1      |              |                    |                                  | 2,90                    | 0,00                    |
| BSU29320                | cmoI | -1     |              | AscR               | CymR                             | 2,37                    | 0,05                    |
| BSU29400                | ascR | 1      |              |                    | CymR                             | 3,55                    | 0,03                    |
| BSU29460                | moaB | -1     |              |                    |                                  | 2,37                    | 0,00                    |
| BSU29620                | hisJ | 1      |              |                    |                                  | 2,06                    | 0,01                    |
| BSU29630                | refZ | -1     |              | PhoP, SpoA         | CcpA                             | 4,50                    | 0,00                    |
| BSU30020                | ytzE | 1      |              |                    |                                  | 2,00                    | 0,03                    |
| BSU30270                | msmE | 1      |              |                    | CcpA                             | 2,37                    | 0,01                    |
| BSU30780                | menC | -1     |              |                    |                                  | 3,29                    | 0,00                    |
| BSU30790                | menE | -1     |              |                    |                                  | 3,41                    | 0,00                    |
| BSU30800                | menB | -1     |              |                    |                                  | 2,17                    | 0,00                    |
| BSU30810                | ytXM | -1     |              |                    |                                  | 4,07                    | 0,00                    |
| BSU31050                | gbsB | -1     |              |                    | GbsR                             | 7,06                    | 0,00                    |
| BSU31060                | gbsA | -1     |              |                    | GbsR                             | 7,91                    | 0,00                    |
| BSU31150                | yubB | -1     |              |                    |                                  | 2,82                    | 0,00                    |
| BSU31160                | yubA | -1     |              |                    |                                  | 4,44                    | 0,00                    |
| BSU31450                | kinB | 1      |              | stringent response | CodY                             | 2,13                    | 0,03                    |
| BSU31670                | yuxO | -1     |              |                    |                                  | 2,38                    | 0,00                    |
| BSU32090                | yuiA | -1     |              |                    | CodY                             | 2,23                    | 0,01                    |
| BSU32140                | paIB | -1     |              |                    |                                  | 320,50                  | 0,00                    |
| BSU32150                | paIA | -1     |              |                    |                                  | 520,16                  | 0,00                    |
| BSU32200                | yutJ | 1      |              |                    |                                  | 3,63                    | 0,00                    |
| BSU32230                | yuxL | -1     |              |                    |                                  | 2,07                    | 0,01                    |
| BSU32240                | thrB | -1     |              |                    | CodY, ThrR                       | 4,72                    | 0,00                    |
| BSU32250                | thrC | -1     |              |                    | CodY, ThrR                       | 4,64                    | 0,00                    |
| BSU32260                | hom  | -1     |              |                    | CodY, ThrR                       | 4,58                    | 0,00                    |
| BSU32330                | lipA | -1     |              |                    |                                  | 4,02                    | 0,00                    |
| BSU32719                | yuzK | -1     |              |                    |                                  | 2,17                    | 0,00                    |
| BSU32760                | yusD | -1     |              | SpoA               |                                  | 3,40                    | 0,00                    |
| BSU32770                | yusE | -1     |              | SpoA               |                                  | 2,92                    | 0,00                    |
| BSU32780                | yusF | -1     |              | SpoA               |                                  | 2,28                    | 0,00                    |
| BSU32890                | yusQ | -1     |              |                    |                                  | 3,56                    | 0,00                    |
| BSU32900                | yusR | -1     |              |                    |                                  | 3,28                    | 0,03                    |
| BSU32910                | yusS | -1     |              |                    |                                  | 3,88                    | 0,03                    |
| BSU32920                | yusT | 1      |              |                    |                                  | 2,84                    | 0,00                    |
| BSU32980                | yusZ | 1      |              |                    |                                  | 2,33                    | 0,01                    |
| BSU33240                | oxdC | 1      | Yvri-YvriHa  |                    |                                  | 4,98                    | 0,00                    |
| BSU33370                | yvgK | -1     |              |                    |                                  | 2,32                    | 0,01                    |

|          |        |    |      |      |      |      |
|----------|--------|----|------|------|------|------|
| BSU28040 | radC   | -1 | ComK |      | 2,63 | 0,01 |
| BSU28050 | maf    | -1 | ComK |      | 3,49 | 0,00 |
| BSU28060 | spolIB | -1 |      |      | 2,05 | 0,02 |
| BSU28070 | comC   | -1 | ComK |      | 5,50 | 0,02 |
| BSU28170 | hemA   | -1 |      | PerR | 2,59 | 0,00 |

| Locus tag <sup>1</sup>  | Gene       | Strand | Sigma factor | Activator  | Repressor                        | Ratio PS38 <sup>2</sup> | BH P-Value <sup>3</sup> |
|-------------------------|------------|--------|--------------|------------|----------------------------------|-------------------------|-------------------------|
| BSU_trNA_84             | trnSL-Arg2 | -1     |              |            |                                  | 8,76                    | 0,01                    |
| BSU28490                | uvrC       | -1     |              |            | LexA                             | 2,13                    | 0,01                    |
| new_2913380_2913: S1078 |            | -1     |              |            |                                  | 3,09                    |                         |
| BSU28510                | abf2       | -1     |              |            | AraR, CcpA                       | 26,99                   | 0,00                    |
| BSU28650                | ysgA       | -1     |              |            |                                  | 2,21                    | 0,00                    |
| BSU28940                | ysaA       | 1      |              |            |                                  | 2,45                    | 0,00                    |
| BSU29110                | phoP       | -1     | SigB, SigE   | PhoP       | CcpA                             | 2,22                    | 0,00                    |
| BSU29120                | mdh        | -1     |              |            | CitB (control of mRN CcpA, CcpC) | 3,00                    | 0,00                    |
| BSU29130                | icd        | -1     |              |            | CitB (control of mRN CcpA, CcpC) | 2,65                    | 0,00                    |
| BSU29140                | citZ       | -1     |              |            | CitB (control of mRN CcpA, CcpC) | 5,76                    | 0,00                    |
| BSU29240                | ytrI       | 1      | SigE         |            |                                  | 2,66                    | 0,00                    |
| BSU29249                | ytzJ       | 1      | SigE         |            |                                  | 4,95                    | 0,00                    |
| BSU29260                | ytpl       | 1      |              |            |                                  | 2,56                    | 0,00                    |
| BSU29630                | refZ       | -1     |              | PhoP, SpoA | CcpA                             | 3,85                    | 0,01                    |
| BSU30780                | menC       | -1     |              |            |                                  | 2,96                    | 0,00                    |
| BSU30790                | menE       | -1     |              |            |                                  | 2,97                    | 0,00                    |
| BSU30810                | ytXM       | -1     |              |            |                                  | 3,42                    | 0,00                    |
| BSU31050                | gbsB       | -1     |              |            | GbsR                             | 3,84                    | 0,00                    |
| BSU31060                | gbsA       | -1     |              |            | GbsR                             | 3,98                    | 0,01                    |
| BSU31150                | yubB       | -1     |              |            |                                  | 2,67                    | 0,00                    |
| BSU31160                | yubA       | -1     |              |            |                                  | 4,14                    | 0,00                    |
| BSU31480                | yuxJ       | 1      |              |            |                                  | 2,56                    | 0,05                    |
| BSU31670                | yuxO       | -1     |              |            |                                  | 2,36                    | 0,00                    |
| BSU32140                | paIB       | -1     |              |            |                                  | 272,13                  | 0,00                    |
| BSU32150                | paIA       | -1     |              |            |                                  | 436,60                  | 0,00                    |
| BSU32200                | yutJ       | 1      |              |            |                                  | 2,99                    | 0,00                    |
| BSU32240                | thrB       | -1     |              |            | CodY, ThrR                       | 2,24                    | 0,02                    |
| BSU32250                | thrC       | -1     |              |            | CodY, ThrR                       | 2,21                    | 0,02                    |
| BSU32260                | hom        | -1     |              |            | CodY, ThrR                       | 2,18                    | 0,02                    |
| BSU32320                | yutC       | 1      |              |            |                                  | 2,24                    | 0,03                    |
| BSU32330                | lipA       | -1     |              |            |                                  | 6,30                    | 0,00                    |
| BSU32690                | sufS       | -1     |              |            |                                  | 2,11                    | 0,00                    |
| BSU32700                | sufD       | -1     |              |            |                                  | 2,25                    | 0,00                    |
| BSU32710                | yurY       | -1     |              |            |                                  | 2,17                    | 0,00                    |
| BSU32719                | yuzK       | -1     |              |            |                                  | 2,18                    | 0,00                    |
| BSU32760                | yusD       | -1     |              | SpoA       |                                  | 2,81                    | 0,00                    |
| BSU32770                | yusE       | -1     |              | SpoA       |                                  | 2,44                    | 0,00                    |
| BSU32890                | yusQ       | -1     |              |            |                                  | 2,83                    | 0,00                    |
| BSU32900                | yusR       | -1     |              |            |                                  | 2,73                    | 0,03                    |
| BSU32910                | yusS       | -1     |              |            |                                  | 3,20                    | 0,04                    |
| BSU32920                | yusT       | 1      |              |            |                                  | 2,74                    | 0,00                    |
| BSU32990                | mrgA       | 1      |              |            | PerR                             | 3,09                    | 0,00                    |
| BSU33240                | oxdC       | 1      | Yvri-YvriHa  |            |                                  | 3,72                    | 0,00                    |

|          |       |         |  |      |  |        |      |
|----------|-------|---------|--|------|--|--------|------|
| BSU33380 | yvgL  | 1       |  |      |  | 20,74  | 0,00 |
| BSU33390 | yvgM  | 1       |  |      |  | 20,16  | 0,00 |
| BSU33540 | azoR2 | -1 SigG |  | MhqR |  | 151,81 | 0,00 |
| BSU33640 | yvaM  | 1       |  | RghR |  | 4,22   | 0,00 |
| BSU34200 | sigL  | -1      |  | CcpA |  | 2,26   | 0,01 |
| BSU34390 | pnbA  | 1       |  | AbrB |  | 22,27  | 0,00 |

| BSU34990               | igt   | -1            |              |           |           | 2,23                    | 0,00                    |
|------------------------|-------|---------------|--------------|-----------|-----------|-------------------------|-------------------------|
| Locus tag <sup>1</sup> | Gene  | Strand        | Sigma factor | Activator | Repressor | Ratio PG10 <sup>2</sup> | BH P-Value <sup>3</sup> |
| BSU35000               | hprK  | -1            |              |           |           | 2,34                    | 0,00                    |
| BSU35310               | yvyD  | -1 SigB, SigH |              | PhoP      |           | 5,48                    | 0,00                    |
| BSU35430               | flgM  | -1 SigD       |              | ComK      |           | 2,06                    | 0,05                    |
| BSU35440               | yvyF  | -1 SigD       |              | ComK      |           | 2,12                    | 0,04                    |
| BSU35450               | comFC | -1            |              | ComK      |           | 3,86                    | 0,00                    |
| BSU35460               | comFB | -1            |              | ComK      |           | 3,89                    | 0,00                    |
| BSU35470               | comFA | -1            |              | ComK      |           | 27,90                   | 0,00                    |

|          |        |    |  |                       |      |       |      |
|----------|--------|----|--|-----------------------|------|-------|------|
| BSU35570 | tuaE   | -1 |  |                       |      | 2,12  | 0,02 |
| BSU35580 | tuaD   | -1 |  |                       |      | 3,17  | 0,00 |
| BSU35590 | tuaC   | -1 |  |                       |      | 3,09  | 0,01 |
| BSU35600 | tuaB   | -1 |  |                       |      | 5,33  | 0,00 |
| BSU35609 | tuaA/1 | -1 |  |                       |      | 7,69  | 0,00 |
| BSU35610 | tuaA/2 | -1 |  | PhoP                  |      | 8,95  | 0,00 |
| BSU36000 | alsD   | -1 |  | AlsR, stringent respo | Rex  | 5,22  | 0,00 |
| BSU36010 | alsS   | -1 |  | AlsR, stringent respo | Rex  | 5,32  | 0,00 |
| BSU36030 | ywrK   | 1  |  |                       |      | 2,19  | 0,03 |
| BSU36250 | ptkA   | -1 |  |                       | AbrB | 2,85  | 0,00 |
| BSU36260 | tkmA   | -1 |  |                       | AbrB | 3,64  | 0,00 |
| BSU36310 | ssbB   | -1 |  | ComK                  |      | 50,68 | 0,00 |
| BSU36470 | pucI   | -1 |  | PucR                  |      | 20,60 | 0,00 |
| BSU36480 | ywoD   | -1 |  |                       | YtrA | 30,97 | 0,00 |
| BSU36490 | ywoC   | -1 |  |                       | YtrA | 35,27 | 0,00 |
| BSU36500 | ywoB   | -1 |  |                       | YtrA | 58,82 | 0,00 |

|          |      |         |  |            |            |         |      |
|----------|------|---------|--|------------|------------|---------|------|
| BSU37030 | racA | 1 SigH  |  | SpoA       |            | 2,06    | 0,00 |
| BSU37040 | ywkB | -1      |  | MalR       |            | 3,18    | 0,01 |
| BSU37050 | maeA | -1      |  | MalR       |            | 3,71    | 0,01 |
| BSU37250 | narI | -1      |  | Fnr        |            | 10,54   | 0,02 |
| BSU37260 | narJ | -1      |  |            |            | 7,95    | 0,01 |
| BSU37270 | narH | -1      |  |            |            | 7,97    | 0,01 |
| BSU37760 | rocC | -1 SigL |  | AhrC, RocR | AbrB, CodY | 54,31   | 0,00 |
| BSU37770 | rocB | -1 SigL |  | AhrC, RocR | AbrB, CodY | 192,63  | 0,00 |
| BSU37780 | rocA | -1 SigL |  | AhrC, RocR | AbrB, CodY | 1411,19 | 0,00 |
| BSU37790 | rocG | -1 SigL |  | AhrC, RocR | AbrB, CodY | 70,13   | 0,00 |
| BSU38080 | ywcl | -1      |  |            | DnaA       | 7,33    | 0,00 |
| BSU38130 | ywcE | 1       |  |            | AbrB       | 2,18    | 0,01 |

|          |      |    |  |                        |           |      |      |
|----------|------|----|--|------------------------|-----------|------|------|
| BSU38340 | ywbF | 1  |  |                        | AbrB      | 2,97 | 0,00 |
| BSU38410 | sacX | 1  |  | SacY (antitermination) |           | 2,02 | 0,00 |
| BSU38470 | ywaD | 1  |  |                        |           | 2,97 | 0,01 |
| BSU38730 | cydD | -1 |  | ResD                   | CcpA, Rex | 5,82 | 0,00 |
| BSU38740 | cydC | -1 |  | ResD                   | CcpA, Rex | 4,92 | 0,02 |

|                         |      |         |  |            |            |       |      |
|-------------------------|------|---------|--|------------|------------|-------|------|
| BSU39330                | abn2 | -1 SigH |  |            | CcpA       | 3,11  | 0,00 |
| BSU40320                | rocF | -1 SigL |  | AhrC, RocR | CodY, SpoA | 10,30 | 0,00 |
| BSU40330                | rocE | -1 SigL |  | AhrC, RocR | CodY, SpoA | 16,90 | 0,00 |
| BSU40340                | rocD | -1 SigL |  | AhrC, RocR | CodY, SpoA | 49,30 | 0,00 |
| BSU40870                | ccpB | -1 SigG |  |            |            | 2,14  | 0,02 |
| BSU40980                | yyaB | 1       |  |            |            | 4,01  | 0,00 |
| new_4215473_4215: S1583 |      | 1       |  |            |            | 10,25 |      |

|          |       |         |  |      |  |        |      |
|----------|-------|---------|--|------|--|--------|------|
| BSU33380 | yvgL  | 1       |  |      |  | 21,68  | 0,00 |
| BSU33390 | yvgM  | 1       |  |      |  | 20,94  | 0,00 |
| BSU33540 | azoR2 | -1 SigG |  | MhqR |  | 168,71 | 0,00 |

| BSU33830               | opuCA | -1     |              | RemA      | OpcR      | 2,33                    | 0,05                    |
|------------------------|-------|--------|--------------|-----------|-----------|-------------------------|-------------------------|
| BSU34390               | pnbA  | 1      |              |           | AbrB      | 17,64                   | 0,00                    |
| BSU34990               | igt   | -1     |              |           |           | 2,12                    | 0,00                    |
| Locus tag <sup>1</sup> | Gene  | Strand | Sigma factor | Activator | Repressor | Ratio P538 <sup>2</sup> | BH P-Value <sup>3</sup> |
| BSU35000               | hprK  | -1     |              |           |           | 2,13                    | 0,00                    |

|          |       |    |  |      |  |      |      |
|----------|-------|----|--|------|--|------|------|
| BSU35470 | comFA | -1 |  | ComK |  | 7,26 | 0,02 |
|----------|-------|----|--|------|--|------|------|

|          |        |    |  |      |                      |      |      |
|----------|--------|----|--|------|----------------------|------|------|
| BSU35580 | tuaD   | -1 |  |      |                      | 2,04 | 0,05 |
| BSU35590 | tuaC   | -1 |  |      |                      | 2,28 | 0,04 |
| BSU35600 | tuaB   | -1 |  |      |                      | 2,69 | 0,03 |
| BSU35609 | tuaA/1 | -1 |  |      |                      | 4,93 | 0,01 |
| BSU35610 | tuaA/2 | -1 |  | PhoP |                      | 5,51 | 0,00 |
| BSU36000 | alsD   | -1 |  | AlsR | Rex, stringent respo | 2,83 | 0,00 |
| BSU36010 | alsS   | -1 |  | AlsR | Rex, stringent respo | 3,01 | 0,00 |
| BSU36030 | ywrK   | 1  |  |      |                      | 3,02 | 0,01 |

|          |      |    |  |      |      |       |      |
|----------|------|----|--|------|------|-------|------|
| BSU36260 | tkmA | -1 |  |      | AbrB | 2,14  | 0,02 |
| BSU36310 | ssbB | -1 |  | ComK |      | 13,98 | 0,00 |
| BSU36470 | pucI | -1 |  | PucR |      | 10,99 | 0,00 |
| BSU36480 | ywoD | -1 |  |      | YtrA | 22,01 | 0,00 |
| BSU36490 | ywoC | -1 |  |      | YtrA | 24,53 | 0,00 |
| BSU36500 | ywoB | -1 |  |      | YtrA | 41,07 | 0,00 |
| BSU36580 | ywnF | -1 |  |      |      | 2,29  | 0,02 |

|          |      |    |  |      |  |      |      |
|----------|------|----|--|------|--|------|------|
| BSU37040 | ywkB | -1 |  | MalR |  | 3,62 | 0,00 |
| BSU37050 | maeA | -1 |  | MalR |  | 4,00 | 0,01 |

|          |      |         |  |            |            |       |      |
|----------|------|---------|--|------------|------------|-------|------|
| BSU37760 | rocC | -1 SigL |  | AhrC, RocR | AbrB, CodY | 5,34  | 0,12 |
| BSU37770 | rocB | -1 SigL |  | AhrC, RocR | AbrB, CodY | 13,88 | 0,06 |
| BSU37780 | rocA | -1 SigL |  | AhrC, RocR | AbrB, CodY | 98,37 | 0,03 |

|          |      |    |  |  |      |      |      |
|----------|------|----|--|--|------|------|------|
| BSU38080 | ywcl | -1 |  |  | DnaA | 7,48 | 0,00 |
|----------|------|----|--|--|------|------|------|

|          |      |                     |  |  |      |       |      |
|----------|------|---------------------|--|--|------|-------|------|
| BSU38240 | ywcA | 1 SigE              |  |  |      | 8,49  | 0,00 |
| BSU38250 | ywbO | -1 SigM, SigW, SigX |  |  |      | 82,72 | 0,00 |
| BSU38340 | ywbF | 1                   |  |  | AbrB | 2,09  | 0,02 |

|          |      |    |  |      |           |      |      |
|----------|------|----|--|------|-----------|------|------|
| BSU38730 | cydD | -1 |  | ResD | CcpA, Rex | 3,75 | 0,01 |
|----------|------|----|--|------|-----------|------|------|

|          |      |         |  |  |       |      |      |
|----------|------|---------|--|--|-------|------|------|
| BSU39040 | yxjS | -1 SigB |  |  |       | 2,77 | 0,04 |
| BSU39060 | citH | 1       |  |  | comEA | 6,53 | 0,00 |

|                         |  |   |  |  |  |      |  |
|-------------------------|--|---|--|--|--|------|--|
| new_4215473_4215: S1583 |  | 1 |  |  |  | 2,59 |  |
|-------------------------|--|---|--|--|--|------|--|

## Downregulated genes

| Locus tag <sup>1</sup> | Gene                | Strand | Sigma factor | Activator            | Repressor             | Ratio PG10 <sup>2</sup> | BH P-Value <sup>3</sup> |
|------------------------|---------------------|--------|--------------|----------------------|-----------------------|-------------------------|-------------------------|
| BSU01480               | truA                | 1      |              |                      | stringent response    | 0,44                    | 0,01                    |
| BSU01730               | sigW                | 1      | SigW         |                      | AbrB                  | 0,46                    | 0,03                    |
| BSU01740               | rsiW                | 1      | SigW         |                      | AbrB                  | 0,42                    | 0,03                    |
| BSU02130               | glpQ                | -1     | SigA         | GlpP (antiterminatio | CcpA                  | 0,15                    | 0,00                    |
| BSU02140               | glpT                | -1     | SigA         | GlpP (antiterminatio | CcpA                  | 0,10                    | 0,00                    |
| BSU02150               | ybeF                | 1      |              |                      |                       | 0,47                    | 0,02                    |
| BSU02350               | gamP                | -1     |              |                      | GamR                  | 0,33                    | 0,01                    |
| BSU02360               | gamA                | -1     |              |                      | GamR                  | 0,33                    | 0,01                    |
| BSU02700               | lip                 | 1      |              |                      | AbrB                  | 0,49                    | 0,03                    |
| BSU02850               | znuA                | 1      | SigA         |                      | Zur                   | 0,42                    | 0,05                    |
| BSU03070               | mdr                 | -1     |              |                      |                       | 0,42                    | 0,00                    |
| BSU03240               | ycgQ                | -1     | SigM         |                      |                       | 0,49                    | 0,01                    |
| BSU03330               | nasA                | 1      |              | TnrA                 |                       | 0,24                    | 0,02                    |
| BSU03480               | srfAA               | 1      |              | ComA, PerR, PhoP     | Abh, Cody, Spx        | 0,01                    | 0,00                    |
| BSU03490               | srfAB               | 1      |              | ComA, PerR, PhoP     | Abh, Cody, Spx        | 0,01                    | 0,00                    |
| BSU03500               | comS                | 1      |              | ComA, PerR, PhoP     | Abh, Cody, Spx        | 0,11                    | 0,00                    |
| BSU03510               | srfAC               | 1      |              | ComA, PerR, PhoP     | Abh, Cody, Spx        | 0,02                    | 0,00                    |
| BSU03520               | srfAD               | 1      |              | ComA, PerR, PhoP     | Abh, Cody, Spx        | 0,03                    | 0,00                    |
| BSU03530               | ycxA                | 1      |              | ComA                 |                       | 0,24                    | 0,00                    |
| BSU03630               | bsdB                | 1      |              | BsdA                 |                       | 0,41                    | 0,03                    |
| BSU04230               | amj                 | 1      | SigM         |                      |                       | 0,28                    | 0,01                    |
| BSU04270               | ydaJ                | 1      | SigB         |                      |                       | 0,25                    | 0,00                    |
| BSU04280               | ydaK                | 1      | SigB         |                      |                       | 0,25                    | 0,01                    |
| BSU04290               | ydaL                | 1      | SigB         |                      |                       | 0,25                    | 0,00                    |
| BSU04300               | ydaM                | 1      | SigB         |                      |                       | 0,25                    | 0,00                    |
| BSU04310               | ydaN                | 1      | SigB         |                      |                       | 0,27                    | 0,00                    |
| BSU04360               | mntH                | -1     |              |                      | MntR                  | 0,39                    | 0,00                    |
| BSU04470               | dctP                | 1      |              |                      | CcpA, FsrA (translati | 0,30                    | 0,00                    |
| BSU04750               | ydcF                | 1      |              |                      |                       | 0,45                    | 0,00                    |
| BSU05310               | ydeR                | -1     |              |                      |                       | 0,35                    | 0,00                    |
| BSU05340               | aseA                | 1      |              | AseR                 |                       | 0,48                    | 0,00                    |
| BSU05344               | ydZ/2               | 1      |              |                      |                       | 0,45                    | 0,00                    |
| BSU_misc_RNA_8         | A-box of pbuE       | -1     |              |                      |                       | 0,00                    | 0,00                    |
| BSU_misc_RNA_9         | G-box upstream of p | 1      |              |                      |                       | 0,36                    | 0,01                    |

| Locus tag <sup>1</sup> | Gene                | Strand | Sigma factor | Activator            | Repressor          | Ratio P538 <sup>2</sup> | BH P-Value <sup>3</sup> |
|------------------------|---------------------|--------|--------------|----------------------|--------------------|-------------------------|-------------------------|
| BSU00390               | yabD                | 1      |              |                      |                    | 0,48                    | 0,00                    |
| BSU00430               | yabG                | 1      | SpoIVCB      |                      |                    | 0,43                    | 0,01                    |
| BSU00660               | yabT                | 1      | SigF         |                      |                    | 0,46                    | 0,02                    |
| BSU01480               | truA                | 1      |              |                      | stringent response | 0,38                    | 0,00                    |
| BSU01520               | ybaK                | 1      | SigG         |                      | LexA               | 0,34                    | 0,01                    |
| BSU02130               | glpQ                | -1     | SigA         | GlpP (antiterminatio | CcpA               | 0,14                    | 0,00                    |
| BSU02140               | glpT                | -1     | SigA         | GlpP (antiterminatio | CcpA               | 0,09                    | 0,00                    |
| BSU02150               | ybeF                | 1      |              |                      |                    | 0,44                    | 0,00                    |
| BSU02350               | gamP                | -1     |              |                      | GamR               | 0,29                    | 0,00                    |
| BSU02360               | gamA                | -1     |              |                      | GamR               | 0,28                    | 0,00                    |
| BSU02400               | ybgF                | -1     |              |                      |                    | 0,42                    | 0,04                    |
| BSU02540               | ycbK                | 1      | SigA         | T-box                | TRAP               | 0,45                    | 0,00                    |
| BSU02660               | ycbU                | 1      |              |                      |                    | 0,23                    | 0,00                    |
| BSU02700               | lip                 | 1      |              |                      | AbrB               | 0,32                    | 0,01                    |
| BSU02750               | natA                | 1      |              | NatR                 |                    | 0,34                    | 0,00                    |
| BSU02760               | natB                | 1      |              | NatR                 |                    | 0,26                    | 0,01                    |
| BSU02810               | cwlK                | -1     |              |                      |                    | 0,45                    | 0,01                    |
| BSU02840               | ycdG                | 1      | SigB         |                      |                    | 0,14                    | 0,05                    |
| BSU02850               | znuA                | 1      | SigA         |                      | Zur                | 0,35                    | 0,02                    |
| BSU02860               | znuC                | 1      | SigA         |                      | Zur                | 0,47                    | 0,02                    |
| BSU02870               | znuB                | 1      | SigA         |                      | Zur                | 0,45                    | 0,01                    |
| BSU03240               | ycgQ                | -1     | SigM         |                      |                    | 0,48                    | 0,01                    |
| BSU03250               | ycgR                | -1     | SigM         |                      |                    | 0,48                    | 0,01                    |
| BSU03330               | nasA                | 1      |              | TnrA                 |                    | 0,21                    | 0,01                    |
| BSU03440               | tlpC                | -1     | SigD         |                      |                    | 0,31                    | 0,03                    |
| BSU04270               | ydaJ                | 1      | SigB         |                      |                    | 0,23                    | 0,00                    |
| BSU04280               | ydaK                | 1      | SigB         |                      |                    | 0,21                    | 0,00                    |
| BSU04290               | ydaL                | 1      | SigB         |                      |                    | 0,22                    | 0,00                    |
| BSU04300               | ydaM                | 1      | SigB         |                      |                    | 0,21                    | 0,00                    |
| BSU04310               | ydaN                | 1      | SigB         |                      |                    | 0,25                    | 0,00                    |
| BSU05040               | yddN                | -1     |              |                      |                    | 0,36                    | 0,03                    |
| BSU05060               | lrpB                | -1     |              |                      |                    | 0,27                    | 0,01                    |
| BSU05190               | ydeG                | 1      |              |                      |                    | 0,40                    | 0,01                    |
| BSU05310               | ydeR                | -1     |              |                      |                    | 0,42                    | 0,01                    |
| BSU05340               | aseA                | 1      |              | AseR                 |                    | 0,50                    | 0,00                    |
| BSU05344               | ydZ/2               | 1      |              |                      |                    | 0,50                    | 0,00                    |
| BSU_misc_RNA_8         | A-box of pbuE       | -1     |              |                      |                    | 0,00                    | 0,00                    |
| BSU_misc_RNA_9         | G-box upstream of p | 1      |              |                      |                    | 0,39                    | 0,01                    |

|                 |                     |   |  |  |                      |      |      |
|-----------------|---------------------|---|--|--|----------------------|------|------|
| BSU06370        | pbuG                | 1 |  |  | G-box (termination), | 0,26 | 0,00 |
| BSU_misc_RNA_10 | G-box upstream of p | 1 |  |  |                      | 0,49 | 0,00 |

| Locus tag <sup>1</sup> | Gene | Strand | Sigma factor | Activator | Repressor | Ratio PG10 <sup>2</sup> | BH P-Value <sup>3</sup> |
|------------------------|------|--------|--------------|-----------|-----------|-------------------------|-------------------------|
| BSU07350               | yfmT | 1      | SigD         |           |           | 0,12                    | 0,00                    |
| BSU07360               | yfmS | 1      | SigD         |           |           | 0,11                    | 0,00                    |

|          |      |    |            |                       |            |      |      |
|----------|------|----|------------|-----------------------|------------|------|------|
| BSU07560 | pel  | 1  |            | ComA                  | CcpA, TnrA | 0,01 | 0,00 |
| BSU07620 | yfIN | 1  |            | CitT                  | CcpA       | 0,45 | 0,04 |
| BSU07800 | treP | 1  |            | PhoP                  | CcpA, TreR | 0,14 | 0,00 |
| BSU07810 | treA | 1  |            | PhoP                  | CcpA, TreR | 0,17 | 0,00 |
| BSU08100 | acoR | 1  |            |                       | CcpA       | 0,37 | 0,01 |
| BSU08760 | spoM | -1 | SigH, SigW |                       |            | 0,46 | 0,03 |
| BSU08910 | queG | 1  |            |                       |            | 0,31 | 0,00 |
| BSU08920 | yhbB | 1  |            |                       |            | 0,24 | 0,00 |
| BSU09280 | glpF | 1  |            | AbrB, GlpP (antiterr) | CcpA       | 0,15 | 0,00 |
| BSU09290 | glpK | 1  |            | AbrB, GlpP (antiterr) | CcpA       | 0,17 | 0,00 |
| BSU09300 | glpD | 1  |            | AbrB, GlpP (antiterr) | CcpA       | 0,20 | 0,00 |
| BSU09370 | lytF | -1 | SigD       |                       | SlrR       | 0,15 | 0,00 |
| BSU09850 | khtU | -1 |            |                       |            | 0,45 | 0,00 |
| BSU09860 | khtT | -1 |            |                       |            | 0,44 | 0,01 |
| BSU10160 | yhgE | 1  |            |                       |            | 0,45 | 0,00 |

|          |       |    |      |  |  |      |      |
|----------|-------|----|------|--|--|------|------|
| BSU10380 | hemAT | -1 | SigD |  |  | 0,07 | 0,00 |
|----------|-------|----|------|--|--|------|------|

|                 |                      |    |  |  |  |      |      |
|-----------------|----------------------|----|--|--|--|------|------|
| BSU_misc_RNA_12 | S-box upstream of yi | -1 |  |  |  | 0,03 | 0,00 |
|-----------------|----------------------|----|--|--|--|------|------|

|          |      |    |  |  |      |      |      |
|----------|------|----|--|--|------|------|------|
| BSU11300 | med  | 1  |  |  | SpoA | 0,12 | 0,00 |
| BSU11310 | comZ | 1  |  |  | SpoA | 0,46 | 0,00 |
| BSU11910 | yjcM | -1 |  |  | AbrB | 0,16 | 0,01 |

|          |      |    |  |      |                       |      |      |
|----------|------|----|--|------|-----------------------|------|------|
| BSU12280 | yjC  | 1  |  |      | Rex, stringent respor | 0,44 | 0,00 |
| BSU12290 | ndh  | 1  |  |      | Rex, stringent respor | 0,36 | 0,00 |
| BSU13040 | hmp  | 1  |  | ResD | NsrR                  | 0,31 | 0,03 |
| BSU13310 | tnrA | -1 |  | TnrA | GlnR                  | 0,15 | 0,00 |
| BSU13420 | dgcW | -1 |  |      |                       | 0,20 | 0,02 |
| BSU13490 | htpX | 1  |  |      | Rok, YkrK             | 0,25 | 0,00 |

|          |      |    |  |  |  |      |      |
|----------|------|----|--|--|--|------|------|
| BSU14630 | speA | -1 |  |  |  | 0,36 | 0,00 |
|----------|------|----|--|--|--|------|------|

|                 |       |   |      |                        |  |      |      |
|-----------------|-------|---|------|------------------------|--|------|------|
| BSU15440        | ylyA  | 1 | SigG | SpoVT                  |  | 0,48 | 0,02 |
| BSU_misc_RNA_28 |       | 1 |      |                        |  | 0,36 | 0,05 |
| BSU15500        | pyrC  | 1 |      | PyrR (antitermination) |  | 0,21 | 0,05 |
| BSU15510        | pyrAA | 1 |      | PyrR (antitermination) |  | 0,16 | 0,04 |
| BSU15520        | pyrAB | 1 |      | PyrR (antitermination) |  | 0,15 | 0,03 |
| BSU15530        | pyrK  | 1 |      | PyrR (antitermination) |  | 0,15 | 0,02 |
| BSU15540        | pyrD  | 1 |      | PyrR (antitermination) |  | 0,14 | 0,03 |
| BSU15550        | pyrF  | 1 |      | PyrR (antitermination) |  | 0,14 | 0,02 |
| BSU15560        | pyrE  | 1 |      | PyrR (antitermination) |  | 0,13 | 0,02 |
| BSU16720        | ymxH  | 1 | SigE |                        |  | 0,30 | 0,01 |
| BSU16880        | ymfJ  | 1 |      |                        |  | 0,50 | 0,01 |

|                 |                     |   |  |         |             |      |      |
|-----------------|---------------------|---|--|---------|-------------|------|------|
| BSU06370        | pbuG                | 1 |  |         | G-box, PurR | 0,08 | 0,00 |
| BSU_misc_RNA_10 | G-box upstream of p | 1 |  |         |             | 0,44 | 0,01 |
| BSU06420        | purE                | 1 |  |         | G-box, PurR | 0,43 | 0,01 |
| BSU06430        | purK                | 1 |  |         | G-box, PurR | 0,45 | 0,00 |
| BSU06440        | purB                | 1 |  |         | G-box, PurR | 0,45 | 0,00 |
| BSU06450        | purC                | 1 |  |         | G-box, PurR | 0,38 | 0,00 |
| BSU06460        | purS                | 1 |  |         | G-box, PurR | 0,39 | 0,00 |
| BSU06470        | purQ                | 1 |  |         | G-box, PurR | 0,39 | 0,01 |
| BSU06480        | purL                | 1 |  |         | G-box, PurR | 0,39 | 0,01 |
| BSU06490        | purF                | 1 |  |         | G-box, PurR | 0,40 | 0,01 |
| BSU06500        | purM                | 1 |  |         | G-box, PurR | 0,35 | 0,00 |
| BSU06510        | purN                | 1 |  |         | G-box, PurR | 0,37 | 0,00 |
| BSU06520        | purH                | 1 |  |         | G-box, PurR | 0,36 | 0,00 |
| BSU06530        | purD                | 1 |  |         | G-box, PurR | 0,43 | 0,01 |
| BSU07300        | yfnE                | 1 |  | SpoIVCB |             | 0,34 | 0,04 |

| Locus tag <sup>1</sup> | Gene | Strand | Sigma factor | Activator | Repressor | Ratio P538 <sup>2</sup> | BH P-Value <sup>3</sup> |
|------------------------|------|--------|--------------|-----------|-----------|-------------------------|-------------------------|
| BSU07350               | yfmT | 1      | SigD         |           |           | 0,06                    | 0,00                    |
| BSU07360               | yfmS | 1      | SigD         |           |           | 0,05                    | 0,00                    |

|                  |      |   |  |      |            |      |      |
|------------------|------|---|--|------|------------|------|------|
| new_820648_82082 | S254 | 1 |  |      |            | 0,37 |      |
| BSU07560         | pel  | 1 |  | ComA | CcpA, TnrA | 0,01 | 0,00 |

|          |      |   |  |      |            |      |      |
|----------|------|---|--|------|------------|------|------|
| BSU07800 | treP | 1 |  | PhoP | CcpA, TreR | 0,08 | 0,02 |
| BSU07810 | treA | 1 |  | PhoP | CcpA, TreR | 0,09 | 0,02 |

|          |      |   |  |  |  |      |      |
|----------|------|---|--|--|--|------|------|
| BSU08910 | queG | 1 |  |  |  | 0,25 | 0,00 |
| BSU08920 | yhbB | 1 |  |  |  | 0,16 | 0,00 |

|          |      |    |      |            |            |      |      |
|----------|------|----|------|------------|------------|------|------|
| BSU09290 | glpK | 1  |      | AbrB, GlpP | CcpA       | 0,33 | 0,04 |
| BSU09300 | glpD | 1  |      | AbrB, GlpP | CcpA       | 0,29 | 0,01 |
| BSU09370 | lytF | -1 | SigD |            | SlrR       | 0,09 | 0,00 |
| BSU09720 | bmrD | 1  |      |            | AbrB, BmrB | 0,31 | 0,05 |

|          |       |    |      |  |      |      |      |
|----------|-------|----|------|--|------|------|------|
| BSU10170 | fabHB | -1 |      |  | FapR | 0,34 | 0,04 |
| BSU10380 | hemAT | -1 | SigD |  |      | 0,05 | 0,00 |
| BSU10410 | yhZC  | -1 |      |  |      | 0,38 | 0,05 |
| BSU10500 | yhgJ  | 1  |      |  |      | 0,17 | 0,01 |
| BSU10850 | ioiX  | 1  |      |  |      | 0,22 | 0,00 |

|          |      |   |      |  |  |      |      |
|----------|------|---|------|--|--|------|------|
| BSU11120 | yitT | 1 | SigB |  |  | 0,01 | 0,00 |
| BSU11130 | ipi  | 1 | SigB |  |  | 0,02 | 0,00 |

|          |      |    |      |      |                       |      |      |
|----------|------|----|------|------|-----------------------|------|------|
| BSU11910 | yjcM | -1 | SigD |      | AbrB                  | 0,06 | 0,00 |
| BSU11920 | yjcN | 1  |      |      | Rok                   | 0,31 | 0,01 |
| BSU11929 | yjzG | 1  |      |      |                       | 0,36 | 0,05 |
| BSU12280 | yjC  | 1  |      |      | Rex, stringent respor | 0,49 | 0,00 |
| BSU12290 | ndh  | 1  |      |      | Rex, stringent respor | 0,40 | 0,00 |
| BSU13040 | hmp  | 1  |      | ResD | NsrR                  | 0,36 | 0,05 |
| BSU13310 | tnrA | -1 |      | TnrA | GlnR                  | 0,16 | 0,00 |
| BSU13420 | dgcW | -1 |      |      |                       | 0,20 | 0,02 |

|          |       |    |      |  |         |      |      |
|----------|-------|----|------|--|---------|------|------|
| BSU13950 | mcpC  | 1  | SigD |  |         | 0,25 | 0,02 |
| BSU14630 | speA  | -1 |      |  |         | 0,44 | 0,00 |
| BSU15170 | spoVD | 1  | SigE |  | SpoIIID | 0,39 | 0,05 |

|          |       |   |      |                        |  |      |      |
|----------|-------|---|------|------------------------|--|------|------|
| BSU15500 | pyrC  | 1 |      | PyrR (antitermination) |  | 0,35 | 0,05 |
| BSU15510 | pyrAA | 1 |      | PyrR (antitermination) |  | 0,31 | 0,05 |
| BSU15520 | pyrAB | 1 |      | PyrR (antitermination) |  | 0,27 | 0,04 |
| BSU15530 | pyrK  | 1 |      | PyrR (antitermination) |  | 0,26 | 0,03 |
| BSU15540 | pyrD  | 1 |      | PyrR (antitermination) |  | 0,24 | 0,03 |
| BSU15550 | pyrF  | 1 |      | PyrR (antitermination) |  | 0,24 | 0,03 |
| BSU15560 | pyrE  | 1 |      | PyrR (antitermination) |  | 0,23 | 0,03 |
| BSU16720 | ymxH  | 1 | SigE |                        |  | 0,43 | 0,00 |

|                        |       |    |            |      |                        |      |      |
|------------------------|-------|----|------------|------|------------------------|------|------|
| BSU17370               | nrdI  | 1  |            | ResD |                        | 0,45 | 0,00 |
| BSU17380               | nrdE  | 1  |            | ResD |                        | 0,46 | 0,01 |
| BSU17390               | nrdF  | 1  |            | ResD |                        | 0,43 | 0,00 |
| BSU17400               | ymaB  | 1  |            | ResD |                        | 0,45 | 0,01 |
| BSU17420               | spoVK | 1  | SigE, SigK |      |                        | 0,43 | 0,00 |
| BSU17680               | thyA  | 1  |            |      |                        | 0,16 | 0,00 |
| BSU18120               | alsT  | 1  |            | TnrA |                        | 0,49 | 0,02 |
| BSU18440               | gltB  | -1 |            | GltC | FsrA (translation inh) | 0,03 | 0,00 |
| BSU18450               | gltA  | -1 |            | GltC | FsrA (translation inh) | 0,03 | 0,00 |
| BSU19310               | dhaS  | 1  |            |      |                        | 0,02 | 0,00 |
| BSU22060               | pbuX  | -1 |            |      | G-box (termination),   | 0,45 | 0,01 |
| BSU22070               | xpt   | -1 |            |      | G-box (termination),   | 0,46 | 0,00 |
| new_2349590_2349: S849 |       | 1  |            |      |                        | 0,32 |      |

|          |      |    |      |      |  |      |      |
|----------|------|----|------|------|--|------|------|
| BSU22900 | ypfB | -1 |      |      |  | 0,42 | 0,01 |
| BSU22910 | dgrA | -1 |      |      |  | 0,41 | 0,01 |
| BSU23170 | spmB | -1 | SigE |      |  | 0,45 | 0,02 |
| BSU23930 | yqjC | -1 | SigK | GerE |  | 0,38 | 0,02 |

| Locus tag <sup>1</sup> | Gene | Strand | Sigma factor | Activator | Repressor | Ratio PG10 <sup>2</sup> | BH P-Value <sup>3</sup> |
|------------------------|------|--------|--------------|-----------|-----------|-------------------------|-------------------------|
| BSU23960               | artR | -1     |              |           |           | 0,47                    | 0,01                    |
| BSU23970               | artQ | -1     |              |           |           | 0,44                    | 0,01                    |
| BSU23980               | artP | -1     |              |           |           | 0,15                    | 0,00                    |
| new_2517585_2517: S912 |      | -1     |              |           |           | 0,28                    |                         |

|                        |      |    |  |  |  |      |      |
|------------------------|------|----|--|--|--|------|------|
| new_2647725_2647: S968 |      | -1 |  |  |  | 0,27 |      |
| BSU27770               | yrbE | -1 |  |  |  | 0,40 | 0,02 |

|          |      |    |      |      |  |      |      |
|----------|------|----|------|------|--|------|------|
| BSU28100 | ysxE | -1 | SigE |      |  | 0,41 | 0,02 |
| BSU28900 | ysbB | -1 |      |      |  | 0,16 | 0,00 |
| BSU28910 | ysbA | -1 |      |      |  | 0,06 | 0,00 |
| BSU29720 | motS | -1 |      |      |  | 0,34 | 0,00 |
| BSU29730 | motP | -1 |      |      |  | 0,38 | 0,00 |
| BSU29990 | pbuO | 1  |      | PurR |  | 0,41 | 0,00 |

|                 |                     |    |  |      |                      |      |      |
|-----------------|---------------------|----|--|------|----------------------|------|------|
| BSU_misc RNA 52 | ydaO switch upstrea | 1  |  |      |                      | 0,14 | 0,00 |
| BSU31090        | ktrA                | 1  |  |      | YdaO (riboswitch, tr | 0,18 | 0,00 |
| BSU31100        | ktrB                | 1  |  |      | YdaO (riboswitch, tr | 0,15 | 0,00 |
| BSU31580        | maeN                | 1  |  | MalR |                      | 0,27 | 0,02 |
| BSU31960        | dhbF                | -1 |  |      | AbrB, Fur            | 0,31 | 0,03 |
| BSU31970        | dhbB                | -1 |  |      | AbrB, Fur            | 0,45 | 0,05 |

|          |      |    |  |      |      |      |      |
|----------|------|----|--|------|------|------|------|
| BSU32100 | yumB | -1 |  |      |      | 0,24 | 0,05 |
| BSU32130 | guaC | 1  |  | CodY | PurR | 0,50 | 0,00 |

|          |      |    |      |  |      |      |      |
|----------|------|----|------|--|------|------|------|
| BSU33490 | cadA | -1 |      |  | CzrA | 0,21 | 0,00 |
| BSU33530 | yvaA | 1  | SigB |  |      | 0,22 | 0,03 |
| BSU33690 | yvaQ | 1  |      |  |      | 0,50 | 0,02 |
| BSU33870 | yvbl | 1  | SigD |  |      | 0,44 | 0,02 |
| BSU33880 | yvbJ | -1 |      |  |      | 0,35 | 0,01 |

|                 |                     |    |      |      |             |      |      |
|-----------------|---------------------|----|------|------|-------------|------|------|
| BSU33950        | cggR                | -1 |      |      | CggR        | 0,45 | 0,00 |
| BSU_misc RNA 56 | T-box upstream of y | -1 |      |      |             | 0,01 | 0,00 |
| BSU34830        | yvzA                | -1 |      | DegU | AbrB        | 0,18 | 0,00 |
| BSU34840        | yvcB                | -1 |      | DegU | AbrB        | 0,21 | 0,00 |
| BSU34850        | yvcA                | -1 |      | DegU | AbrB        | 0,05 | 0,00 |
| BSU35620        | lytC                | -1 | SigD |      | SlrR, YvrHb | 0,21 | 0,00 |
| BSU35630        | lytB                | -1 | SigD |      | SlrR, YvrHb | 0,19 | 0,00 |
| BSU35640        | lytA                | -1 | SigD |      | SlrR, YvrHb | 0,18 | 0,00 |

|          |      |    |  |  |  |      |      |
|----------|------|----|--|--|--|------|------|
| BSU35679 | yvzH | -1 |  |  |  | 0,29 | 0,00 |
| BSU35680 | ggaB | -1 |  |  |  | 0,25 | 0,00 |

|          |       |   |               |      |  |      |      |
|----------|-------|---|---------------|------|--|------|------|
| BSU17370 | nrdI  | 1 |               | ResD |  | 0,35 | 0,00 |
| BSU17380 | nrdE  | 1 |               | ResD |  | 0,34 | 0,00 |
| BSU17390 | nrdF  | 1 |               | ResD |  | 0,33 | 0,00 |
| BSU17400 | ymaB  | 1 |               | ResD |  | 0,37 | 0,00 |
| BSU17420 | spoVK | 1 | SigE, SpoIVCB |      |  | 0,42 | 0,00 |
| BSU17680 | thyA  | 1 |               |      |  | 0,24 | 0,00 |
| BSU18120 | alsT  | 1 |               | TnrA |  | 0,49 | 0,01 |

|          |      |    |  |  |                      |      |      |
|----------|------|----|--|--|----------------------|------|------|
| BSU19310 | dhaS | 1  |  |  |                      | 0,02 | 0,00 |
| BSU22060 | pbuX | -1 |  |  | G-box (termination), | 0,14 | 0,00 |
| BSU22070 | xpt  | -1 |  |  | G-box (termination), | 0,17 | 0,00 |

|          |      |    |      |  |  |      |      |
|----------|------|----|------|--|--|------|------|
| BSU22860 | yphA | -1 | SigF |  |  | 0,35 | 0,03 |
| BSU22900 | ypfB | -1 |      |  |  | 0,30 | 0,00 |
| BSU22910 | dgrA | -1 |      |  |  | 0,32 | 0,00 |

|          |      |    |      |      |  |      |      |
|----------|------|----|------|------|--|------|------|
| BSU23930 | yqjC | -1 | SigK | GerE |  | 0,32 | 0,01 |
|----------|------|----|------|------|--|------|------|

| Locus tag <sup>1</sup> | Gene | Strand | Sigma factor | Activator | Repressor | Ratio PS38 <sup>2</sup> | BH P-Value <sup>3</sup> |
|------------------------|------|--------|--------------|-----------|-----------|-------------------------|-------------------------|
| BSU25050               | yqgA | -1     |              |           |           | 0,43                    | 0,00                    |
| BSU26470               | yrkL | -1     |              |           |           | 0,50                    | 0,01                    |

|          |      |    |  |  |      |      |      |
|----------|------|----|--|--|------|------|------|
| BSU27850 | nadA | -1 |  |  | NadR | 0,45 | 0,02 |
| BSU27860 | nadC | -1 |  |  | NadR | 0,49 | 0,03 |

|          |      |    |  |  |      |      |      |
|----------|------|----|--|--|------|------|------|
| BSU28900 | ysbB | -1 |  |  |      | 0,15 | 0,01 |
| BSU28910 | ysbA | -1 |  |  |      | 0,07 | 0,00 |
| BSU29720 | motS | -1 |  |  |      | 0,34 | 0,00 |
| BSU29730 | motP | -1 |  |  |      | 0,38 | 0,00 |
| BSU29900 | trmB | -1 |  |  | PurR | 0,00 | 0,00 |
| BSU30740 | mntD | -1 |  |  |      | 0,19 | 0,00 |
| BSU30750 | mntC | -1 |  |  |      | 0,19 | 0,00 |
| BSU30760 | mntB | -1 |  |  |      | 0,20 | 0,00 |
| BSU30770 | mntA | -1 |  |  | MntR | 0,27 | 0,01 |

|                 |                     |   |  |      |                 |      |      |
|-----------------|---------------------|---|--|------|-----------------|------|------|
| BSU_misc RNA 52 | ydaO switch upstrea | 1 |  |      |                 | 0,12 | 0,00 |
| BSU31090        | ktrA                | 1 |  |      | YdaO riboswitch | 0,20 | 0,00 |
| BSU31100        | ktrB                | 1 |  |      | YdaO riboswitch | 0,19 | 0,00 |
| BSU31580        | maeN                | 1 |  | MalR |                 | 0,21 | 0,01 |

|          |      |    |  |  |      |      |      |
|----------|------|----|--|--|------|------|------|
| BSU32030 | yuiG | 1  |  |  | BirA | 0,42 | 0,02 |
| BSU32100 | yumB | -1 |  |  |      | 0,20 | 0,05 |

|          |      |    |      |      |      |      |      |
|----------|------|----|------|------|------|------|------|
| BSU33040 | citG | -1 |      |      |      | 0,45 | 0,00 |
| BSU33120 | liaH | -1 |      |      |      | 0,39 | 0,02 |
| BSU33130 | liaI | -1 |      | LiaR |      | 0,38 | 0,03 |
| BSU33490 | cadA | -1 |      |      | CzrA | 0,22 | 0,00 |
| BSU33530 | yvaA | 1  | SigB |      |      | 0,22 | 0,03 |

|                 |                     |    |      |  |      |      |      |
|-----------------|---------------------|----|------|--|------|------|------|
| BSU33870        | yvbl                | 1  | SigD |  |      | 0,27 | 0,00 |
| BSU33880        | yvbJ                | -1 |      |  |      | 0,22 | 0,00 |
| BSU33890        | yvbK                | 1  |      |  |      | 0,37 | 0,01 |
| BSU33950        | cggR                | -1 |      |  | CggR | 0,42 | 0,00 |
| BSU_misc RNA 56 | T-box upstream of y | -1 |      |  |      | 0,01 | 0,00 |

|          |      |    |      |      |             |      |      |
|----------|------|----|------|------|-------------|------|------|
| BSU34830 | yvzA | -1 |      | DegU | AbrB        | 0,18 | 0,00 |
| BSU34840 | yvcB | -1 |      | DegU | AbrB        | 0,21 | 0,00 |
| BSU34850 | yvcA | -1 |      | DegU | AbrB        | 0,05 | 0,00 |
| BSU35620 | lytC | -1 | SigD |      | SlrR, YvrHb | 0,17 | 0,00 |
| BSU35630 | lytB | -1 | SigD |      | SlrR, YvrHb | 0,17 | 0,00 |
| BSU35640 | lytA | -1 | SigD |      | SlrR, YvrHb | 0,15 | 0,00 |

|          |      |    |            |  |  |      |      |
|----------|------|----|------------|--|--|------|------|
| BSU35650 | tagU | 1  | SigM, SigX |  |  | 0,35 | 0,00 |
| BSU35679 | yvzH | -1 |            |  |  | 0,22 | 0,00 |
| BSU35680 | ggaB | -1 |            |  |  | 0,20 | 0,00 |



|                         |      |    |  |  |  |      |      |
|-------------------------|------|----|--|--|--|------|------|
| BSU35690                | ggaA | -1 |  |  |  | 0,26 | 0,01 |
| BSU35698                | yvzI | -1 |  |  |  | 0,22 | 0,02 |
| new_3671623_3672: S1368 |      | -1 |  |  |  | 0,19 |      |

|          |      |   |  |      |  |      |      |
|----------|------|---|--|------|--|------|------|
| BSU36450 | ywoG | 1 |  |      |  | 0,37 | 0,01 |
| BSU36510 | nrgA | 1 |  | TnrA |  | 0,11 | 0,01 |
| BSU36520 | nrgB | 1 |  | TnrA |  | 0,45 | 0,02 |

|          |      |    |  |      |  |      |      |
|----------|------|----|--|------|--|------|------|
| BSU37180 | fadF | -1 |  | FadR |  | 0,32 | 0,02 |
|----------|------|----|--|------|--|------|------|

|          |      |   |  |      |      |      |      |
|----------|------|---|--|------|------|------|------|
| BSU37460 | rapF | 1 |  | ComA | CcpA | 0,02 | 0,00 |
|----------|------|---|--|------|------|------|------|

|          |      |    |  |                         |  |      |      |
|----------|------|----|--|-------------------------|--|------|------|
| BSU37560 | thrZ | -1 |  | T-box (antitermination) |  | 0,50 | 0,03 |
|----------|------|----|--|-------------------------|--|------|------|

|          |      |    |      |  |      |      |      |
|----------|------|----|------|--|------|------|------|
| BSU38100 | ywch | -1 | SigD |  | SpoA | 0,40 | 0,00 |
|----------|------|----|------|--|------|------|------|

|          |      |   |  |  |  |      |      |
|----------|------|---|--|--|--|------|------|
| BSU38320 | ywbH | 1 |  |  |  | 0,26 | 0,00 |
|----------|------|---|--|--|--|------|------|

|          |      |   |  |  |  |      |      |
|----------|------|---|--|--|--|------|------|
| BSU38330 | ywbG | 1 |  |  |  | 0,27 | 0,00 |
|----------|------|---|--|--|--|------|------|

|          |      |   |  |  |      |      |      |
|----------|------|---|--|--|------|------|------|
| BSU38450 | dtrR | 1 |  |  | DtrR | 0,36 | 0,00 |
|----------|------|---|--|--|------|------|------|

|                 |                      |   |  |  |  |      |      |
|-----------------|----------------------|---|--|--|--|------|------|
| BSU_misc_RNA_59 | T-box upstream of ty | 1 |  |  |  | 0,35 | 0,00 |
|-----------------|----------------------|---|--|--|--|------|------|

| Locus tag <sup>1</sup> | Gene            | Strand | Sigma factor | Activator | Repressor | Ratio PG10 <sup>2</sup> | BH P-Value <sup>3</sup> |
|------------------------|-----------------|--------|--------------|-----------|-----------|-------------------------|-------------------------|
| BSU_misc_RNA_60        | yxkD riboswitch | -1     |              |           |           | 0,00                    | 0,00                    |

|                 |               |   |  |  |  |      |      |
|-----------------|---------------|---|--|--|--|------|------|
| BSU_misc_RNA_63 | G-box of nupG | 1 |  |  |  | 0,00 | 0,00 |
|-----------------|---------------|---|--|--|--|------|------|

|          |      |    |  |       |            |      |      |
|----------|------|----|--|-------|------------|------|------|
| BSU39220 | wapl | -1 |  | YvrHb | DegU, WalR | 0,13 | 0,00 |
|----------|------|----|--|-------|------------|------|------|

|          |     |    |  |  |      |      |      |
|----------|-----|----|--|--|------|------|------|
| BSU40040 | yxA | -1 |  |  | AbrB | 0,40 | 0,02 |
|----------|-----|----|--|--|------|------|------|

|          |      |   |  |      |            |      |      |
|----------|------|---|--|------|------------|------|------|
| BSU40050 | gntR | 1 |  | AbrB | CcpA, GntR | 0,43 | 0,01 |
|----------|------|---|--|------|------------|------|------|

|          |      |   |  |      |            |      |      |
|----------|------|---|--|------|------------|------|------|
| BSU40060 | gntK | 1 |  | AbrB | CcpA, GntR | 0,34 | 0,02 |
|----------|------|---|--|------|------------|------|------|

|          |      |   |  |      |            |      |      |
|----------|------|---|--|------|------------|------|------|
| BSU40070 | gntP | 1 |  | AbrB | CcpA, GntR | 0,33 | 0,02 |
|----------|------|---|--|------|------------|------|------|

|          |      |   |  |      |            |      |      |
|----------|------|---|--|------|------------|------|------|
| BSU40080 | gntZ | 1 |  | AbrB | CcpA, GntR | 0,49 | 0,01 |
|----------|------|---|--|------|------------|------|------|

|          |      |    |  |  |  |      |      |
|----------|------|----|--|--|--|------|------|
| BSU40110 | bglA | -1 |  |  |  | 0,30 | 0,00 |
|----------|------|----|--|--|--|------|------|

|          |      |    |  |  |  |      |      |
|----------|------|----|--|--|--|------|------|
| BSU40120 | yyzE | -1 |  |  |  | 0,31 | 0,00 |
|----------|------|----|--|--|--|------|------|

|          |      |   |  |  |  |      |      |
|----------|------|---|--|--|--|------|------|
| BSU40550 | ppaC | 1 |  |  |  | 0,14 | 0,00 |
|----------|------|---|--|--|--|------|------|

|          |      |    |      |  |  |      |      |
|----------|------|----|------|--|--|------|------|
| BSU40940 | yyaD | -1 | SigE |  |  | 0,30 | 0,00 |
|----------|------|----|------|--|--|------|------|

|                         |      |    |  |  |  |      |      |
|-------------------------|------|----|--|--|--|------|------|
| BSU35690                | ggaA | -1 |  |  |  | 0,21 | 0,00 |
| BSU35698                | yvzI | -1 |  |  |  | 0,24 | 0,02 |
| new_3671623_3672: S1368 |      | -1 |  |  |  | 0,19 |      |

|          |      |    |      |  |  |      |      |
|----------|------|----|------|--|--|------|------|
| BSU36390 | flhP | -1 | SigD |  |  | 0,47 | 0,03 |
|----------|------|----|------|--|--|------|------|

|          |      |    |      |  |  |      |      |
|----------|------|----|------|--|--|------|------|
| BSU36400 | flhO | -1 | SigD |  |  | 0,47 | 0,03 |
|----------|------|----|------|--|--|------|------|

|          |      |   |  |  |  |      |      |
|----------|------|---|--|--|--|------|------|
| BSU36450 | ywoG | 1 |  |  |  | 0,40 | 0,01 |
|----------|------|---|--|--|--|------|------|

|          |      |   |  |      |  |      |      |
|----------|------|---|--|------|--|------|------|
| BSU36510 | nrgA | 1 |  | TnrA |  | 0,11 | 0,01 |
|----------|------|---|--|------|--|------|------|

|          |      |   |  |      |  |      |      |
|----------|------|---|--|------|--|------|------|
| BSU36520 | nrgB | 1 |  | TnrA |  | 0,33 | 0,02 |
|----------|------|---|--|------|--|------|------|

|          |      |    |      |  |  |      |      |
|----------|------|----|------|--|--|------|------|
| BSU36960 | ywbB | -1 | SigB |  |  | 0,48 | 0,01 |
|----------|------|----|------|--|--|------|------|

|          |      |    |  |  |      |      |      |
|----------|------|----|--|--|------|------|------|
| BSU37180 | fadF | -1 |  |  | FadR | 0,34 | 0,02 |
|----------|------|----|--|--|------|------|------|

|          |      |    |      |  |  |      |      |
|----------|------|----|------|--|--|------|------|
| BSU37240 | ywiE | -1 | SigB |  |  | 0,15 | 0,04 |
|----------|------|----|------|--|--|------|------|

|          |      |   |  |      |      |      |      |
|----------|------|---|--|------|------|------|------|
| BSU37460 | rapF | 1 |  | ComA | CcpA | 0,02 | 0,00 |
|----------|------|---|--|------|------|------|------|

|          |      |    |      |  |      |      |      |
|----------|------|----|------|--|------|------|------|
| BSU38100 | ywch | -1 | SigD |  | SpoA | 0,39 | 0,02 |
|----------|------|----|------|--|------|------|------|

|          |      |   |  |  |  |      |      |
|----------|------|---|--|--|--|------|------|
| BSU38320 | ywbH | 1 |  |  |  | 0,24 | 0,00 |
|----------|------|---|--|--|--|------|------|

|          |      |   |  |  |  |      |      |
|----------|------|---|--|--|--|------|------|
| BSU38330 | ywbG | 1 |  |  |  | 0,31 | 0,00 |
|----------|------|---|--|--|--|------|------|

|          |      |   |  |  |      |      |      |
|----------|------|---|--|--|------|------|------|
| BSU38450 | dtrR | 1 |  |  | DtrR | 0,30 | 0,00 |
|----------|------|---|--|--|------|------|------|

|                 |                      |   |  |  |  |      |      |
|-----------------|----------------------|---|--|--|--|------|------|
| BSU_misc_RNA_59 | T-box upstream of ty | 1 |  |  |  | 0,29 | 0,00 |
|-----------------|----------------------|---|--|--|--|------|------|

|          |      |   |  |  |      |      |      |
|----------|------|---|--|--|------|------|------|
| BSU38460 | tyrZ | 1 |  |  | DtrR | 0,38 | 0,00 |
|----------|------|---|--|--|------|------|------|

|          |      |    |  |  |  |      |      |
|----------|------|----|--|--|--|------|------|
| BSU38490 | menA | -1 |  |  |  | 0,30 | 0,00 |
|----------|------|----|--|--|--|------|------|

|          |      |   |  |  |      |      |      |
|----------|------|---|--|--|------|------|------|
| BSU38550 | ywaA | 1 |  |  | CodY | 0,10 | 0,00 |
|----------|------|---|--|--|------|------|------|

| Locus tag <sup>1</sup> | Gene            | Strand | Sigma factor | Activator | Repressor | Ratio P538 <sup>2</sup> | BH P-Value <sup>3</sup> |
|------------------------|-----------------|--------|--------------|-----------|-----------|-------------------------|-------------------------|
| BSU_misc_RNA_60        | yxkD riboswitch | -1     |              |           |           | 0,00                    | 0,00                    |

|                         |  |   |  |  |  |      |  |
|-------------------------|--|---|--|--|--|------|--|
| new_3996377_3996: S1495 |  | 1 |  |  |  | 0,09 |  |
|-------------------------|--|---|--|--|--|------|--|

|          |      |   |      |  |      |      |      |
|----------|------|---|------|--|------|------|------|
| BSU38930 | yxjI | 1 | SigB |  | DegU | 0,24 | 0,04 |
|----------|------|---|------|--|------|------|------|

|          |      |    |      |  |      |      |      |
|----------|------|----|------|--|------|------|------|
| BSU38970 | yxjF | -1 | SigE |  | CcpA | 0,42 | 0,00 |
|----------|------|----|------|--|------|------|------|

|          |      |   |  |  |       |      |      |
|----------|------|---|--|--|-------|------|------|
| BSU39020 | nupG | 1 |  |  | G-box | 0,10 | 0,00 |
|----------|------|---|--|--|-------|------|------|

|          |      |    |  |  |  |      |      |
|----------|------|----|--|--|--|------|------|
| BSU40359 | yyzO | -1 |  |  |  | 0,41 | 0,00 |
|----------|------|----|--|--|--|------|------|

|          |      |    |  |  |  |      |      |
|----------|------|----|--|--|--|------|------|
| BSU40460 | yyzB | -1 |  |  |  | 0,47 | 0,03 |
|----------|------|----|--|--|--|------|------|

|          |      |   |  |     |  |      |      |
|----------|------|---|--|-----|--|------|------|
| BSU40490 | yycA | 1 |  | YcU |  | 0,49 | 0,01 |
|----------|------|---|--|-----|--|------|------|

|          |      |   |  |  |  |      |      |
|----------|------|---|--|--|--|------|------|
| BSU40550 | ppaC | 1 |  |  |  | 0,19 | 0,00 |
|----------|------|---|--|--|--|------|------|

|          |      |    |      |  |  |      |      |
|----------|------|----|------|--|--|------|------|
| BSU40880 | exoA | -1 | SigG |  |  | 0,49 | 0,00 |
|----------|------|----|------|--|--|------|------|

|          |      |    |      |  |  |      |      |
|----------|------|----|------|--|--|------|------|
| BSU40940 | yyaD | -1 | SigE |  |  | 0,26 | 0,01 |
|----------|------|----|------|--|--|------|------|
