# Supplementary material for: Large-scale reduction of the Bacillus subtilis genome: consequences for the transcriptional network, resource allocation, and metabolism
Source: PubMed Central journal article supplement — Genome Res. 2017 Feb;27(2):289–99. doi: 10.1101/gr.215293.116 (PMC5287234; doi:10.1101/gr.215293.116), 2017-02
Supplement: supp_gr.215293.116_Supplemental_Table_S4.pdf [file supp_gr.215293.116_Supplemental_Table_S4.pdf]

Supplemental Table S4: External and internal metabolome analysis

|                                            | Internal |       |      | External |       |       |       |
|--------------------------------------------|----------|-------|------|----------|-------|-------|-------|
|                                            | Δ6       | PG10  | PS38 | Medium   | Δ6    | PG10  | PS38  |
| <b>Sugar and sugar derived metabolites</b> |          |       |      |          |       |       |       |
| Fructose-1-phosphate                       | 1,00     | 0,18  | 0,24 |          |       |       |       |
| Fructose-6-phosphate                       | 1,00     | 0,51  | 0,39 |          |       |       |       |
| Glucitol                                   | 1,00     | 0,88  | 0,89 | 0,813    | 1,000 | 0,710 | 1,395 |
| Gluconic acid                              | 1,00     | 1,50  | 1,48 | 0,000    | 1,000 | 1,105 | 0,943 |
| Gluconic acid δ-lactone                    | 1,00     | 0,90  | 0,87 | 1,246    | 1,000 | 0,928 | 1,038 |
| Glucose                                    | 1,00     | 1,31  | 1,34 | 1,226    | 1,000 | 0,958 | 1,062 |
| Glucose-6-phosphat                         | 1,00     | 0,71  | 0,50 |          |       |       |       |
| Hexoaldose                                 | 1,00     | 1,30  | 1,35 | 0,896    | 1,000 | 1,033 | 1,150 |
| <i>myo</i> -Inositol                       | 1,00     | 1,32  | 1,30 | 1,588    | 1,000 | 0,993 | 1,125 |
| Ribose-5-phosphate                         | 1,00     | 0,78  | 0,31 |          |       |       |       |
| Trehalose                                  | 1,00     | 1,46  | 1,56 | 0,984    | 1,000 | 1,073 | 1,218 |
| <b>Amino acids</b>                         |          |       |      |          |       |       |       |
| Alanine                                    | 1,00     | 1,38  | 1,21 | 1,980    | 1,000 | 1,189 | 1,728 |
| Arginine                                   | 1,00     | 1,30  | 1,38 | 0,771    | 1,000 | 0,906 | 0,978 |
| Aspartate                                  | 1,00     | 1,83  | 1,49 | 1,398    | 1,000 | 1,174 | 1,334 |
| Glutamate                                  | 1,00     | 3,56  | 0,72 | 1,313    | 1,000 | 1,121 | 1,188 |
| Glycine                                    | 1,00     | 0,88  | 0,71 | 1,322    | 1,000 | 1,032 | 1,226 |
| Isoleucine                                 | 1,00     | 1,39  | 1,23 | 1,489    | 1,000 | 1,050 | 1,338 |
| Leucine                                    | 1,00     | 1,41  | 1,31 | 1,464    | 1,000 | 1,065 | 1,383 |
| Lysine                                     | 1,00     | 1,44  | 1,42 | 1,326    | 1,000 | 1,107 | 1,285 |
| Ornithine                                  | 1,00     | 15,78 | 1,92 | 23,956   | 1,000 | 1,690 | 1,939 |
| Phenylalanine                              | 1,00     | 1,09  | 1,08 | 0,633    | 1,000 | 0,894 | 0,768 |
| Proline                                    | 1,00     | 2,86  | 1,30 | 2,003    | 1,000 | 0,940 | 1,163 |
| Serine                                     | 1,00     | 1,41  | 1,31 | 1,631    | 1,000 | 1,350 | 1,512 |
| Threonine                                  | 1,00     | 1,48  | 1,36 | 1,410    | 1,000 | 1,166 | 1,348 |
| Valine                                     | 1,00     | 1,32  | 1,21 | 1,439    | 1,000 | 1,051 | 1,307 |
| <b>Organic acids</b>                       |          |       |      |          |       |       |       |
| Citrate                                    | 1,00     | 0,70  | 0,41 | 0,341    | 1,000 | 1,014 | 1,143 |
| Fumarate                                   | 1,00     | 1,33  | 0,94 | 0,346    | 1,000 | 0,882 | 1,151 |
| Glycerate                                  | 1,00     | 1,23  | 0,87 | 1,310    | 1,000 | 1,072 | 1,178 |
| Malate                                     | 1,00     | 1,60  | 1,60 | 1,733    | 1,000 | 2,352 | 2,649 |
| Pyruvate                                   | 1,00     | 0,40  | 0,31 | 0,070    | 1,000 | 0,194 | 0,252 |
| Succinate                                  | 1,00     | 1,38  | 1,19 | 1,497    | 1,000 | 1,033 | 1,217 |
| <b>Others</b>                              |          |       |      |          |       |       |       |
| Ethanolamine                               | 1,00     | 1,18  | 1,09 | 1,036    | 1,000 | 1,048 | 1,249 |
| GABA                                       | 1,00     | 1,62  | 1,40 | 2,362    | 1,000 | 1,189 | 1,425 |
| Glycerol                                   | 1,00     | 1,06  | 1,06 | 1,480    | 1,000 | 1,277 | 1,362 |
| Glycerol-3-phosphate                       | 1,00     | 1,51  | 0,90 | 0,294    | 1,000 | 1,358 | 1,609 |
| 3-Phosphoglycerate                         | 1,00     | 1,92  | 0,30 |          |       |       |       |
| Hexanetretol                               | 1,00     | 1,31  | 1,41 |          |       |       |       |
| Phosphate                                  | 1,00     | 1,39  | 1,05 | 1,220    | 1,000 | 1,071 | 1,201 |
| Threitol/Erythritol.                       | 1,00     | 1,16  | 1,02 | 1,679    | 1,000 | 1,205 | 1,175 |
| Urea                                       | 1,00     | 1,14  | 1,22 | 0,892    | 1,000 | 8,290 | 2,896 |
| 2-methyl-2,3-hydroxy propanate             |          |       |      | 1,643    | 1,000 | 1,042 | 1,147 |
| <b>Unknowns</b>                            |          |       |      |          |       |       |       |
| U 17.09                                    | 1,00     | 0,37  | 0,17 | 0,291    | 1,000 | 0,648 | 0,608 |
| U20.51                                     | 1,00     | 1,09  | 1,08 |          |       |       |       |
| U21.86                                     | 1,00     | 1,14  | 1,06 |          |       |       |       |
| U29.42                                     | 1,00     | 1,54  | 1,59 | 1,260    | 1,000 | 1,317 | 1,625 |
| U30.94                                     | 1,00     | 1,21  | 1,48 | 1,662    | 1,000 | 1,301 | 1,631 |
| U 36.5                                     | 1,00     | 0,84  | 0,91 |          |       |       |       |
