# Supplementary material for: Large-scale reduction of the Bacillus subtilis genome: consequences for the transcriptional network, resource allocation, and metabolism
Source: PubMed Central journal article supplement — Genome Res. 2017 Feb;27(2):289–99. doi: 10.1101/gr.215293.116 (PMC5287234; doi:10.1101/gr.215293.116), 2017-02
Supplement: supp_gr.215293.116_Supplemental_Table_S5.pdf [file supp_gr.215293.116_Supplemental_Table_S5.pdf]

**Supplemental Table S5: Proteome spectra library**

SMM: Spizizen's minimal medium

Data dependent acquisition (DDA) - Sample description

| <i>B.subtilis</i> strain | sample material and cultivation conditions                                 | sampling points                                      | biological replicates | fractionation    | MS instrument type | number of raw files | used for DIA library | Raw file names                                                                                              |
|--------------------------|----------------------------------------------------------------------------|------------------------------------------------------|-----------------------|------------------|--------------------|---------------------|----------------------|-------------------------------------------------------------------------------------------------------------|
| 168 trp+                 | bacteria from cultivation in SMM medium                                    | exponential growth,<br>(SMM:OD <sub>578</sub> -1),   | 3                     | non-fractionated | Q Exactive™        | 3                   | YES                  | 151022_QEp_PK_SMM_Br1_DDA.raw<br>151022_QEp_PK_SMM_Br2_DDA.raw<br>151022_QEp_PK_SMM_Br3_DDA.raw             |
| 168 trp+                 | bacteria from cultivation in SMM medium + 1 mM Glycine betaine             | exponential growth,<br>(SMM:OD <sub>578</sub> -0.4), | 3                     | non-fractionated | Q Exactive™        | 3                   | YES                  | 151022_QEp_PK_GB_Br1_DDA.raw<br>151022_QEp_PK_GB_Br2_DDA.raw<br>151022_QEp_PK_GB_Br3_DDA.raw                |
| 168 trp+                 | bacteria from cultivation in SMM medium + 1.2 M NaCl                       | exponential growth,<br>(SMM:OD <sub>578</sub> -0.4), | 3                     | non-fractionated | Q Exactive™        | 3                   | YES                  | 151022_QEp_PK_NaCl_Br1_DDA.raw<br>151022_QEp_PK_NaCl_Br2_DDA.raw<br>151022_QEp_PK_NaCl_Br3_DDA.raw          |
| 168 trp+                 | bacteria from cultivation in SMM medium + 1.2 M NaCl+ 1 mM Glycine betaine | exponential growth,<br>(SMM:OD <sub>578</sub> -0.4), | 3                     | non-fractionated | Q Exactive™        | 3                   | YES                  | 151022_QEp_PK_NaCl_GB_Br1_DDA.raw<br>151022_QEp_PK_NaCl_GB_Br2_DDA.raw<br>151022_QEp_PK_NaCl_GB_Br3_DDA.raw |
| 168 trp+                 | Exponential phase Competence                                               | exponential growth,<br>(MC:OD540-0.4),               | 2                     | non-fractionated | Q Exactive™        | 1                   | YES                  | 150723_QE1_PK_Bsub_Exp_Comp_DDA.raw                                                                         |
| 168 trp+                 | Exponential phase Sporulation                                              | exponential growth,<br>(DSM:=OD540-0.4),             | 2                     | non-fractionated | Q Exactive™        | 1                   | YES                  | 150723_QE1_PK_Bsub_Exp_DSM_DDA.raw                                                                          |

| <i>B.subtilis</i> strain | sample material and cultivation conditions | sampling points                                | biological replicates | fractionation                   | MS instrument type | number of raw files | used for DIA library | Raw file names                                                                                                                                                                                                 |
|--------------------------|--------------------------------------------|------------------------------------------------|-----------------------|---------------------------------|--------------------|---------------------|----------------------|----------------------------------------------------------------------------------------------------------------------------------------------------------------------------------------------------------------|
| 168 trp+                 | Ethanol shock 4%                           | exponential growth,<br><br>(BMM:OD500-0.4),    | 2                     | non-fractionated                | Q Exactive™        | 2                   | YES                  | 150723_QE1_PK_Bsub_Eth_1_DDA.raw<br>150723_QE1_PK_Bsub_Eth_2_DDA.raw                                                                                                                                           |
| 168 trp+                 | Heat Shock 52°C                            | exponential growth,<br><br>(BMM:OD500-0.4),    | 2                     | non-fractionated                | Q Exactive™        | 2                   | YES                  | 150723_QE1_PK_Bsub_Heat_1_DDA.raw<br>150723_QE1_PK_Bsub_Heat_2_DDA.raw                                                                                                                                         |
| 168 trp+                 | Competence                                 | transient phase<br><br>(MC:OD540-2.0),         | 2                     | non-fractionated                | Q Exactive™        | 2                   | YES                  | 150723_QE1_PK_Bsub_Comp_1_DDA.raw<br>150723_QE1_PK_Bsub_Comp_2_DDA.raw                                                                                                                                         |
| 168 trp+                 | Sporulation                                | stationary phase<br><br>(DSM: 3h stat. phase), | 2                     | non-fractionated                | Q Exactive™        | 2                   | YES                  | 150723_QE1_PK_Bsub_Spore_1_DDA.raw<br>150723_QE1_PK_Bsub_Spore_2_DDA.raw                                                                                                                                       |
| 168 trp+                 | Exponential phase Competence + Sporulation | exponential growth,<br><br>(MC+DSM:OD540-0.4), | 2                     | Pre-fractionated (Gel-LC-MS/MS) | Q Exactive™        | 6                   | YES                  | 150723_QE1_PK_Bsub_Exp_PF_1.raw<br>150723_QE1_PK_Bsub_Exp_PF_2.raw<br>150723_QE1_PK_Bsub_Exp_PF_3.raw<br>150723_QE1_PK_Bsub_Exp_PF_4.raw<br>150723_QE1_PK_Bsub_Exp_PF_5.raw<br>150723_QE1_PK_Bsub_Exp_PF_6.raw |
| 168 trp+                 | Ethanol shock 4%                           | exponential growth,<br><br>(BMM:OD500-0.4),    | 2                     | Pre-fractionated (Gel-LC-MS/MS) | Q Exactive™        | 6                   | YES                  | 150723_QE1_PK_Bsub_Eth_PF_1.raw<br>150723_QE1_PK_Bsub_Eth_PF_2.raw<br>150723_QE1_PK_Bsub_Eth_PF_3.raw<br>150723_QE1_PK_Bsub_Eth_PF_4.raw<br>150723_QE1_PK_Bsub_Eth_PF_5.raw<br>150723_QE1_PK_Bsub_Eth_PF_6.raw |

| <i>B.subtilis</i> strain | sample material and cultivation conditions                                                 | sampling points                                       | biological replicates | fractionation                   | MS instrument type | number of raw files | used for DIA library | Raw file names                                                                                                                                                                                                             |
|--------------------------|--------------------------------------------------------------------------------------------|-------------------------------------------------------|-----------------------|---------------------------------|--------------------|---------------------|----------------------|----------------------------------------------------------------------------------------------------------------------------------------------------------------------------------------------------------------------------|
| 168 trp+                 | Heat Shock 52°C                                                                            | exponential growth,<br><br>(BMM:OD500-0.4),           | 2                     | Pre-fractionated (Gel-LC-MS/MS) | Q Exactive™        | 5                   | YES                  | 150723_QE1_PK_Bsub_Heat_PF_1.raw<br>150723_QE1_PK_Bsub_Heat_PF_2.raw<br>150723_QE1_PK_Bsub_Heat_PF_3.raw<br>150723_QE1_PK_Bsub_Heat_PF_4.raw<br>150723_QE1_PK_Bsub_Heat_PF_5.raw                                           |
| 168 trp+                 | Competence                                                                                 | transient phase<br><br>(MC:OD540-2.0),                | 2                     | Pre-fractionated (Gel-LC-MS/MS) | Q Exactive™        | 6                   | YES                  | 150723_QE1_PK_Bsub_Comp_PF_1.raw<br>150723_QE1_PK_Bsub_Comp_PF_2.raw<br>150723_QE1_PK_Bsub_Comp_PF_3.raw<br>150723_QE1_PK_Bsub_Comp_PF_4.raw<br>150723_QE1_PK_Bsub_Comp_PF_5.raw<br>150723_QE1_PK_Bsub_Comp_PF_6.raw       |
| 168 trp+                 | Sporulation                                                                                | stationary phase<br><br>(DSM: 3h stat. phase),        | 2                     | Pre-fractionated (Gel-LC-MS/MS) | Q Exactive™        | 6                   | YES                  | 150723_QE1_PK_Bsub_Spore_PF_1.raw<br>150723_QE1_PK_Bsub_Spore_PF_2.raw<br>150723_QE1_PK_Bsub_Spore_PF_3.raw<br>150723_QE1_PK_Bsub_Spore_PF_4.raw<br>150723_QE1_PK_Bsub_Spore_PF_5.raw<br>150723_QE1_PK_Bsub_Spore_PF_6.raw |
| D6                       | bacteria from cultivation in rich medium LB. (sample collected via <b>centrifugation</b> ) | exponential growth,<br><br>(LB:OD <sub>578</sub> -1), | 4                     | non-fractionated                | Q Exactive Plus™   | 4                   | YES                  | 150710_QEp_PK_Bsub_DG_Br1.raw<br>150710_QEp_PK_Bsub_DG_Br2.raw<br>150710_QEp_PK_Bsub_DG_Br3.raw<br>150710_QEp_PK_Bsub_DG_Br4.raw                                                                                           |
| D6                       | bacteria from cultivation in rich medium LB. (sample collected via <b>filtration</b> )     | exponential growth,<br><br>(LB:OD <sub>578</sub> -1), | 4                     | non-fractionated                | Q Exactive Plus™   | 4                   | YES                  | 150710_QEp_PK_Bsub_FDG_Br1.raw<br>150710_QEp_PK_Bsub_FDG_Br2.raw<br>150710_QEp_PK_Bsub_FDG_Br3.raw<br>150710_QEp_PK_Bsub_FDG_Br4.raw                                                                                       |
| PG10                     | bacteria from cultivation in rich medium LB. (sample collected via <b>centrifugation</b> ) | exponential growth,<br><br>(LB:OD <sub>578</sub> -1), | 4                     | non-fractionated                | Q Exactive Plus™   | 4                   | YES                  | 150710_QEp_PK_Bsub_PG10_Br1.raw<br>150710_QEp_PK_Bsub_PG10_Br2.raw<br>150710_QEp_PK_Bsub_PG10_Br3.raw<br>150710_QEp_PK_Bsub_PG10_Br4.raw                                                                                   |

| <i>B.subtilis</i> strain | sample material and cultivation conditions                                                                  | sampling points                                                              | biological replicates             | fractionation    | MS instrument type | number of raw files | used for DIA library | Raw file names                                                                                                                                                                                                              |
|--------------------------|-------------------------------------------------------------------------------------------------------------|------------------------------------------------------------------------------|-----------------------------------|------------------|--------------------|---------------------|----------------------|-----------------------------------------------------------------------------------------------------------------------------------------------------------------------------------------------------------------------------|
| PG10                     | bacteria from cultivation in rich medium LB. (sample collected via filtration)                              | exponential growth,<br><br>(LB:OD <sub>578</sub> -1),                        | 4                                 | non-fractionated | Q Exactive Plus™   | 4                   | YES                  | 150710_QEp_PK_Bsub_F_PG10_Br1.raw<br>150710_QEp_PK_Bsub_F_PG10_Br2.raw<br>150710_QEp_PK_Bsub_F_PG10_Br3.raw<br>150710_QEp_PK_Bsub_F_PG10_Br4.raw                                                                            |
| IIG                      | bacteria from cultivation in rich medium LB. (sample collected via centrifugation)                          | exponential growth,<br><br>(LB:OD <sub>578</sub> -1),                        | 4                                 | non-fractionated | Q Exactive Plus™   | 4                   | YES                  | 150710_QEp_PK_Bsub_IIG_Br1.raw<br>150710_QEp_PK_Bsub_IIG_Br2.raw<br>150710_QEp_PK_Bsub_IIG_Br3.raw<br>150710_QEp_PK_Bsub_IIG_Br4.raw                                                                                        |
| IIG                      | bacteria from cultivation in rich medium LB. (sample collected via filtration)                              | exponential growth,<br><br>(LB:OD <sub>578</sub> -1),                        | 4                                 | non-fractionated | Q Exactive Plus™   | 4                   | YES                  | 150710_QEp_PK_Bsub_F_IIG_Br1.raw<br>150710_QEp_PK_Bsub_F_IIG_Br2.raw<br>150710_QEp_PK_Bsub_F_IIG_Br3.raw<br>150710_QEp_PK_Bsub_F_IIG_Br4.raw                                                                                |
| D6                       | extracellular proteome samples from cultivation in rich medium LB. (sample collected via TCA precipitation) | exponential growth and Stationary,<br><br>(LB:OD <sub>578</sub> -1 and 3.0), | 3 (exponential),<br>3(stationary) | non-fractionated | Q Exactive Plus™   | 6                   | YES                  | 151012_QEp_PK_Sec_1_2_DDA.raw<br>151012_QEp_PK_Sec_1_DDA.raw<br>151012_QEp_PK_Sec_2_2_DDA.raw<br>151012_QEp_PK_Sec_2_DDA.raw<br>151012_QEp_PK_Sec_3_2_DDA.raw<br>151012_QEp_PK_Sec_3_DDA.raw                                |
| PS38                     | extracellular proteome samples from cultivation in rich medium LB. (sample collected via TCA precipitation) | exponential growth and Stationary,<br><br>(LB:OD <sub>578</sub> -1 and 3.0), | 3 (exponential),<br>3(stationary) | non-fractionated | Q Exactive Plus™   | 6                   | YES                  | 151012_QEp_PK_Sec_4_DDA.raw<br>151020_QEp_PK_Sec_4_2_DDA.raw<br>151020_QEp_PK_Sec_5_DDA.raw<br>151012_QEp_PK_Sec_5_2_DDA.raw<br>151012_QEp_PK_Sec_5_DDA.raw<br>151020_QEp_PK_Sec_6_DDA.raw<br>151012_QEp_PK_Sec_6_2_DDA.raw |
| PG10                     | extracellular proteome samples from cultivation in rich medium LB. (sample collected via TCA precipitation) | exponential growth and Stationary,<br><br>(LB:OD <sub>578</sub> -1 and 3.0), | 3 (exponential),<br>3(stationary) | non-fractionated | Q Exactive Plus™   | 6                   | YES                  | 151012_QEp_PK_Sec_6_DDA.raw<br>151012_QEp_PK_Sec_7_2_DDA.raw<br>151012_QEp_PK_Sec_7_DDA.raw<br>151012_QEp_PK_Sec_8_2_DDA.raw<br>151012_QEp_PK_Sec_8_DDA.raw<br>151012_QEp_PK_Sec_9_2_DDA.raw<br>151012_QEp_PK_Sec_9_DDA.raw |

## Data independent acquisition (DIA) - Sample description

| <i>B.subtilis</i> strain | sample material and cultivation conditions                                         | sampling points                                                   | biological replicates | fractionation    | MS instrument type | number of raw files | Raw file names                                                                                                                               |
|--------------------------|------------------------------------------------------------------------------------|-------------------------------------------------------------------|-----------------------|------------------|--------------------|---------------------|----------------------------------------------------------------------------------------------------------------------------------------------|
| D6                       | bacteria from cultivation in rich medium LB. (sample collected via centrifugation) | exponential growth,<br><br>(LB:OD <sub>578</sub> <sup>-1</sup> ), | 4                     | non-fractionated | Q Exactive™        | 4                   | 150802_QE1_PK_P_DG_<br>Br1.raw<br>150802_QE1_PK_P_DG_<br>Br2.raw<br>150802_QE1_PK_P_DG_<br>Br3.raw<br>150802_QE1_PK_P_DG_<br>Br4.raw         |
| PG10                     | bacteria from cultivation in rich medium LB. (sample collected via centrifugation) | exponential growth,<br><br>(LB:OD <sub>578</sub> <sup>-1</sup> ), | 4                     | non-fractionated | Q Exactive™        | 4                   | 150802_QE1_PK_P_PG1<br>0_Br1.raw<br>150802_QE1_PK_P_PG1<br>0_Br2.raw<br>150802_QE1_PK_P_PG1<br>0_Br3.raw<br>150802_QE1_PK_P_PG1<br>0_Br4.raw |
| PS38                     | bacteria from cultivation in rich medium LB. (sample collected via centrifugation) | exponential growth,<br><br>(LB:OD <sub>578</sub> <sup>-1</sup> ), | 4                     | non-fractionated | Q Exactive™        | 4                   | 150802_QE1_PK_P_IIG_<br>Br1.raw<br>150802_QE1_PK_P_IIG_<br>Br2.raw<br>150802_QE1_PK_P_IIG_<br>Br3.raw<br>150802_QE1_PK_P_IIG_<br>Br4.raw     |
